# Supplementary material for: Mapping autism risk loci using genetic linkage and chromosomal rearrangements
Source: Springer Nature journal article supplement (doi:10.1038/ng1985), 2007-02-18
Supplement: ng1985-S6.pdf [file ng1985-S6.pdf]

**Mapping autism risk loci using genetic linkage and chromosomal rearrangements** (The Autism Genome Project (AGP) Consortium)

**Supplementary Table 2. List of 254 CNVs in Affected Individuals.**

Supplementary Table 5: List of 254 CNVs in Affected Individuals (NCBI Build 35)

| Sample ID             | CNV/sample | Chr | Cytoband               | Start       | Stop        | Size       | #SNPs/segment | CNV  | Familial | Mendelian error | dGV | RefGene                                                                                                                   | % overlap |
|-----------------------|------------|-----|------------------------|-------------|-------------|------------|---------------|------|----------|-----------------|-----|---------------------------------------------------------------------------------------------------------------------------|-----------|
| NAAR065-D7-HI2326     | 2          | 1   | 1p36.12                | 21,400,700  | 21,625,400  | 224,700    | 2             | gain |          |                 | yes |                                                                                                                           | 100.0%    |
| NAAR074-A7-04C35667   | 5          | 1   | 1p31.3                 | 60,389,500  | 61,350,000  | 960,500    | 6             | gain | yes      |                 | yes | MGC40069 NM_182615                                                                                                        | 34.4%     |
| NAAR074-D1-04C35701   | 1          | 1   | 1p31.3                 | 60,629,100  | 61,350,000  | 720,900    | 5             | gain | yes      |                 |     |                                                                                                                           | 0.0%      |
| NAAR003-D2-8055-204   | 1          | 1   | 1p21.2                 | 101,987,000 | 101,998,000 | 11,000     | 3             | loss |          |                 |     | KIFC3 NM_005550 MMP15 NM_002428 GPR56 NM_005682 TEPP NM_005682 SIGLEC6 NM_198845 ZNF613 NM_001031721 ZNF614 NM_025040 SIC | 0.0%      |
| NAAR066-H6-HI2815     | 1          | 1   | 1p21.1                 | 105,739,000 | 105,801,000 | 62,000     | 3             | gain |          |                 | yes |                                                                                                                           | 58.5%     |
| NAAR007-D5-8172-201   | 1          | 1   | 1q21.1                 | 143,780,000 | 144,894,000 | 1,114,000  | 7             | gain | yes      |                 | yes | ADCY2 NM_020546 NSUN2 NM_017755 IRX1 NM_024337 ICE1 NM_17E                                                                | 13.2%     |
| NAAR007-D6-8172-202   | 1          | 1   | 1q21.1                 | 143,780,000 | 144,894,000 | 1,114,000  | 7             | gain | yes      |                 | yes | LOC134147 NM_138809 CTNND2 NM_001332 LOC134145 NM_199133                                                                  | 18.2%     |
| NAAR025-E10-3090.002  | 1          | 1   | 1q21.1                 | 143,780,000 | 144,479,000 | 699,000    | 6             | gain |          |                 | yes |                                                                                                                           | 53.8%     |
| NAAR048-G5-02C09922   | 1          | 1   | 1q21.1                 | 143,780,000 | 144,894,000 | 1,114,000  | 7             | gain |          |                 | yes | SNRPN NM_022806 SNRPN NM_022807 UBE3A NM_130839 OCA2 NM                                                                   | 30.7%     |
| NAAR070-D8-HI3079     | 1          | 1   | 1q21.1                 | 143,780,000 | 144,894,000 | 1,114,000  | 7             | loss | yes      |                 |     | APIN NM_017855 C4orf7 NM_152997 CSN3 NM_005212                                                                            | 0.0%      |
| NAAR006-A3-8125-201   | 6          | 1   | 1q23.3                 | 158,901,000 | 159,090,000 | 189,000    | 6             | gain |          |                 | yes |                                                                                                                           | 47.5%     |
| NAAR069-H9-04C29142   | 3          | 1   | 1q23.3                 | 158,901,000 | 159,599,000 | 698,000    | 7             | gain |          |                 | yes |                                                                                                                           | 100.0%    |
| NAAR058-E4-HI1581     | 1          | 1   | 1q31.1                 | 185,134,000 | 185,838,000 | 704,000    | 7             | loss | yes      |                 | yes | PMP22 NM_153322 FLJ45831 NM_001001684 TEKT3 NM_031898 PMF                                                                 | 100.0%    |
| NAAR048-G6-02C09923   | 2          | 1   | 1q42.3                 | 232,746,000 | 232,746,000 | 0          | 2             | loss |          |                 | yes |                                                                                                                           | 30.7%     |
| NAAR043-F6-01C06146   | 1          | 2   | 2p25.3                 | 1,725,230   | 1,743,780   | 18,550     | 3             | gain | yes      |                 | yes | SNRPN NM_022806 SNRPN NM_022807 UBE3A NM_130839 OCA2 NM                                                                   | 0.0%      |
| NAAR043-F7-01C06147   | 1          | 2   | 2p25.3                 | 1,725,230   | 1,743,780   | 18,550     | 3             | gain | yes      |                 | yes | HTR1F NM_000866 CGGBP1 NM_00100390 CGGBP1 NM_003663 ZN                                                                    | 0.0%      |
| NAAR056-F7-HI0995     | 1          | 2   | 2p24.3                 | 14,316,000  | 15,674,900  | 1,358,900  | 11            | gain |          |                 | yes |                                                                                                                           | 0.0%      |
| NAAR032-G1-3222.004   | 2          | 2   | 2p24.1                 | 21,249,500  | 22,833,700  | 1,584,200  | 7             | gain | yes      |                 |     |                                                                                                                           | 14.7%     |
| NAAR067-F3-HI1481     | 4          | 2   | 2p22.3                 | 32,986,100  | 33,204,100  | 218,000    | 3             | gain |          |                 |     |                                                                                                                           | 0.0%      |
| NAAR010-E6-8265-201   | 1          | 2   | 2p16.3                 | 51,891,200  | 52,313,100  | 421,900    | 4             | gain |          |                 |     | TMEM16E NM_213599 SLC17A6 NM_020346                                                                                       | 14.7%     |
| NAAR043-H6-01C06231   | 4          | 2   | 2p16.1                 | 58,068,200  | 59,840,200  | 1,772,000  | 6             | gain |          |                 | yes |                                                                                                                           | 100.0%    |
| NAAR078-C9-F-031-003  | 1          | 2   | 2p12.2                 | 79,137,200  | 79,137,300  | 100        | 2             | loss |          |                 | yes |                                                                                                                           | 78.3%     |
| NAAR071-G6-04C33169   | 1          | 2   | 2p11.2                 | 83,832,600  | 84,397,700  | 565,100    | 7             | gain |          |                 | yes |                                                                                                                           | 100.0%    |
| NAAR003-A5-8047-202   | 4          | 2   | 2p11.2                 | 88,993,300  | 88,993,400  | 100        | 2             | loss |          |                 | yes |                                                                                                                           | 12.1%     |
| NAAR003-F10-8064-201  | 1          | 2   | 2p11.2                 | 88,993,300  | 88,993,400  | 100        | 2             | loss |          |                 | yes |                                                                                                                           | 6.4%      |
| NAAR052-E11-HI0559    | 1          | 2   | 2q12.1                 | 104,863,000 | 104,863,000 | 0          | 3             | loss |          |                 | yes | ASTN2 NM_198187 ASTN2 NM_014010 ASTN2 NM_198188 ASTN2 NM                                                                  | 15.0%     |
| NAAR052-G3-HI0186     | 1          | 2   | 2q12.3                 | 106,922,000 | 107,678,000 | 756,000    | 7             | gain |          |                 | yes | ANKRD15 NM_153186 DMRT2 NM_181872 DMRT1 NM_021951 DMRT.                                                                   | 68.9%     |
| NAAR022-E8-3020.004   | 1          | 2   | 2q13                   | 111,333,000 | 112,712,000 | 1,379,000  | 6             | gain | yes      |                 | yes | SUCLG2 NM_003848 FAM19A4 NM_001005527 FAM19A1 NM_213609                                                                   | 2.1%      |
| NAAR015-H9-R-103-008  | 1          | 2   | 2q22.3                 | 145,475,000 | 145,587,000 | 112,000    | 3             | gain |          |                 | yes | C2orf10 NM_194250                                                                                                         | 14.5%     |
| NAAR001-A9-8002-202   | 7          | 2   | 2q24.1                 | 154,759,000 | 155,131,000 | 372,000    | 4             | loss |          |                 | yes | GALNT13 NM_052917                                                                                                         | 0.0%      |
| NAAR071-F2-04C33150   | 1          | 2   | 2q24.1                 | 156,592,000 | 157,717,000 | 1,125,000  | 8             | gain |          |                 | yes |                                                                                                                           | 0.3%      |
| NAAR077-H7-05C40979   | 1          | 2   | 2q24.3                 | 165,478,000 | 166,218,000 | 740,000    | 4             | gain |          |                 | yes | RNF2 NM_007212 VNS1 ABP NM_016389 VNS1 ABP NM_006469 C1orf                                                                | 6.7%      |
| NAAR048-G6-02C09923   | 2          | 2   | 2q31.1                 | 172,258,000 | 172,303,000 | 45,000     | 3             | loss |          |                 |     |                                                                                                                           | 0.0%      |
| NAAR006-A3-8125-201   | 6          | 2   | 2q32.1                 | 184,270,000 | 186,428,000 | 2,158,000  | 11            | gain | yes      |                 |     | MOV10L1 NM_018995                                                                                                         | 0.0%      |
| NAAR006-A4-8125-202   | 1          | 2   | 2q32.1                 | 184,623,000 | 186,428,000 | 1,805,000  | 9             | gain | yes      |                 | yes | ANKRD15 NM_015158 DMRT1 NM_021951 ANKRD15 NM_153186 DMF                                                                   | 68.9%     |
| NAAR057-F1-HI1281     | 2          | 2   | 2q32.1                 | 185,302,000 | 186,892,000 | 1,590,000  | 8             | gain |          |                 |     | MOV10L1 NM_018995                                                                                                         | 0.0%      |
| NAAR062-A2-HI0717     | 1          | 3   | 3p26.3                 | 1,478,480   | 2,264,800   | 786,320    | 6             | gain |          |                 |     |                                                                                                                           | 0.0%      |
| NAAR058-D6-HI1540     | 6          | 3   | 3p14.2                 | 59,347,700  | 59,711,600  | 363,900    | 7             | gain |          |                 | yes | KIAA1944 NM_133448                                                                                                        | 100.0%    |
| NAAR007-B6-8159-203   | 1          | 3   | 3p14.1                 | 67,773,300  | 68,967,900  | 1,194,600  | 7             | loss | yes      | yes             |     | MCTP2 NM_018349                                                                                                           | 0.0%      |
| NAAR077-H11-HI1824    | 4          | 3   | 3p13                   | 70,753,700  | 71,252,700  | 499,000    | 4             | gain |          |                 | yes | SNRPN NM_022806 SNRPN NM_022807 UBE3A NM_130839 OCA2 NM                                                                   | 30.7%     |
| NAAR037-A9-1014-A9-P3 | 3          | 3   | 3p12.2                 | 82,496,200  | 83,190,200  | 694,000    | 6             | gain | yes      | yes             |     | CDH13 NM_0010257                                                                                                          | 0.0%      |
| NAAR025-D4-3081.005   | 1          | 3   | 3p12.1                 | 85,618,700  | 85,619,200  | 500        | 3             | loss | yes      | yes             | yes | ANKRD15 NM_153186 DMRT2 NM_181872 DMRT1 NM_021951 DMRT.                                                                   | 68.9%     |
| NAAR078-D11-R-001-017 | 1          | 3   | 3p12.1                 | 85,618,700  | 85,619,200  | 500        | 3             | loss |          |                 | yes | SGCZ NM_139167                                                                                                            | 52.8%     |
| NAAR049-E2-02C10442   | 1          | 3   | 3q24                   | 149,082,000 | 149,082,000 | 0          | 2             | loss |          |                 |     |                                                                                                                           | 0.0%      |
| NAAR007-F6-8177-202   | 3          | 3   | 3q25.31 3q25.32        | 157,517,000 | 159,424,000 | 1,907,000  | 10            | gain |          |                 | yes | ANKRD15 NM_153186 DMRT2 NM_181872 DMRT1 NM_021951 DMRT.                                                                   | 68.9%     |
| NAAR064-F12-HI2093    | 5          | 3   | 3q25.31 3q25.32        | 157,517,000 | 158,701,000 | 1,184,000  | 7             | gain |          |                 | yes |                                                                                                                           | 20.6%     |
| NAAR052-F6-HI0682     | 3          | 4   | 4p16.3 4p16.2 4p16.1   | 398,952     | 17,044,800  | 16,645,848 | 64            | loss | yes      |                 |     |                                                                                                                           | 0.0%      |
| NAAR062-H3-HI1083     | 2          | 4   | 4p16.3 4p16.2 4p16.1   | 398,952     | 6,790,030   | 6,391,078  | 12            | gain | yes      |                 | yes | IRF4 NM_002460 HUS1B NM_148959 DUSP22 NM_020185 EXOC2 NM                                                                  | 32.9%     |
| NAAR071-B8-HI3174     | 2          | 4   | 4p15.33 4p16.1         | 10,760,900  | 11,857,300  | 1,096,400  | 7             | gain |          |                 | yes |                                                                                                                           | 100.0%    |
| NAAR052-F6-HI0682     | 3          | 4   | 4p15.32 4p15.31 4p15.2 | 18,188,800  | 23,734,300  | 5,545,500  | 20            | loss | yes      |                 |     | CDH8 NM_001796                                                                                                            | 0.0%      |
| NAAR035-C8-1014-C8-P1 | 1          | 4   | 4p15.2                 | 24,846,300  | 24,846,500  | 200        | 2             | gain |          |                 | yes | HTR7 NM_019859 MPHOSPH1 NM_016195 PANK1 NM_138316 HTR7                                                                    | 2.0%      |
| NAAR065-F7-HI2361     | 3          | 4   | 4p15.1                 | 28,022,000  | 28,870,800  | 848,800    | 7             | gain |          |                 |     |                                                                                                                           | 0.0%      |
| NAAR001-A9-8002-202   | 7          | 4   | 4q13.3                 | 71,370,900  | 71,371,300  | 400        | 3             | loss |          |                 |     |                                                                                                                           | 0.0%      |
| NAAR010-F7-8268-201   | 1          | 4   | 4q26                   | 117,347,000 | 118,226,000 | 879,000    | 7             | gain | yes      |                 | yes |                                                                                                                           | 100.0%    |
| NAAR069-F6-HI2662     | 2          | 4   | 4q32.2 4q32.3          | 164,134,000 | 167,151,000 | 3,017,000  | 15            | gain |          |                 |     | MMP15 NM_002428 GPR56 NM_005682 GPR56 NM_201525 TEPP NM                                                                   | 0.0%      |
| NAAR046-F3-01C08055   | 2          | 4   | 4q34.3 4q35.1 4q35.2   | 182,216,000 | 188,232,000 | 6,016,000  | 27            | gain |          |                 |     | TRPM3 NM_206946 TRPM3 NM_206944 TRPM3 NM_020952 TRPM3 N                                                                   | 0.0%      |
| NAAR031-C8-3213.002   | 1          | 4   | 4q34.3                 | 182,703,000 | 182,703,000 | 0          | 3             | gain |          |                 |     | MMP15 NM_002428 GPR56 NM_005682 GPR56 NM_201525 TEPP NM                                                                   | 0.0%      |
| NAAR047-F8-01C08500   | 1          | 4   | 4q35.1 4q35.2          | 185,809,000 | 189,310,000 | 3,501,000  | 17            | gain | yes      |                 | yes |                                                                                                                           | 57.5%     |
| NAAR047-F9-01C08501   | 1          | 4   | 4q35.1 4q35.2          | 185,809,000 | 189,310,000 | 3,501,000  | 17            | gain | yes      |                 | yes |                                                                                                                           | 72.3%     |
| NAAR062-D6-HI0890     | 1          | 4   | 4q35.2                 | 188,901,000 | 189,905,000 | 1,004,000  | 9             | gain | yes      |                 |     |                                                                                                                           | 0.0%      |
| NAAR062-D7-HI0891     | 1          | 4   | 4q35.2                 | 188,901,000 | 189,310,000 | 409,000    | 4             | loss | yes      |                 | yes | OR2T33 NM_001004695 OR2L2 NM_001004686 OR2T33 NM_001005495                                                                | 79.6%     |
| NAAR007-A6-8156-201   | 1          | 4   | 4q35.2                 | 189,303,000 | 189,310,000 | 7,000      | 3             | loss |          |                 |     |                                                                                                                           | 100.0%    |
| NAAR027-C6-3120.003   | 1          | 4   | 4q35.2                 | 189,303,000 | 189,310,000 | 7,000      | 3             | loss | yes      |                 |     |                                                                                                                           | 0.0%      |
| NAAR027-D6-3120.004   | 1          | 4   | 4q35.2                 | 189,303,000 | 189,310,000 | 7,000      | 3             | loss | yes      |                 | yes | TNFRSF8 NM_152942 CLCN6 NM_021737 PRAMEF3 NM_001013692 F                                                                  | 31.5%     |
| NAAR056-B12-HI0790    | 1          | 4   | 4q35.2                 | 189,303,000 | 189,310,000 | 7,000      | 3             | loss |          |                 |     | KLK13 NM_015596 KLK10 NM_002776 KLK12 NM_145895 KLK9 NM_0                                                                 | 0.0%      |
| NAAR070-H5-HI3148     | 1          | 4   | 4q35.2                 | 189,303,000 | 189,310,000 | 7,000      | 3             | loss | yes      |                 |     |                                                                                                                           | 0.0%      |
| NAAR071-A7-HI3161     | 1          | 4   | 4q35.2                 | 189,303,000 | 189,310,000 | 7,000      | 3             | loss | yes      |                 |     |                                                                                                                           | 0.0%      |
| NAAR023-F9-3046.003   | 1          | 4   | 4q35.2                 | 189,670,000 | 190,118,000 | 448,000    | 7             | loss | yes      | yes             | yes | GJA5 NM_005266 CHD1L NM_004284 BCL9 NM_004326 FMO5 NM_00                                                                  | 33.6%     |
| NAAR073-E12-04C35554  | 1          | 4   | 4q35.2                 | 189,670,000 | 190,118,000 | 448,000    | 7             | gain | yes      |                 |     |                                                                                                                           | 0.0%      |
| NAAR073-F2-04C35556   | 1          | 4   | 4q35.2                 | 189,670,000 | 190,200,000 | 530,000    | 8             | gain | yes      |                 |     |                                                                                                                           | 0.0%      |
| NAAR024-A12-3072.008  | 1          | 4   | 4q35.2                 | 189,808,000 | 191,091,000 | 1,283,000  | 12            | loss | yes      | yes             | yes | GJA5 NM_005266 CHD1L NM_004284 BCL9 NM_004326 FMO5 NM_00                                                                  | 33.6%     |
| NAAR041-G7-01C05468   | 2          | 4   | 4q35.2                 | 190,013,000 | 191,091,000 | 1,078,000  | 8             | loss | yes      | yes             | yes |                                                                                                                           | 100.0%    |
| NAAR046-F3-01C08055   | 2          | 4   | 4q35.2                 | 190,013,000 | 191,091,000 | 1,078,000  | 8             | gain |          |                 |     |                                                                                                                           |           |

| Sample ID             | CNV/sample | Chr | Cytoband                 | Start       | Stop        | Size       | #SNPs/segment | CNV  | Familial | Mendelian error | dGV | RefGene                                                             | % overlap |
|-----------------------|------------|-----|--------------------------|-------------|-------------|------------|---------------|------|----------|-----------------|-----|---------------------------------------------------------------------|-----------|
| NAAR003-A5-8047-202   | 4          | 5   | 5p15.31\5p15.2\5p15.1    | 9,538,490   | 16,046,000  | 6,507,510  | 24            | loss |          |                 | yes |                                                                     | 32.0%     |
| NAAR030-E12-3198.003  | 1          | 5   | 5p14.1                   | 29,073,500  | 29,136,100  | 62,600     | 4             | loss | yes      | yes             | yes |                                                                     | 11.2%     |
| NAAR030-F12-3198.004  | 2          | 5   | 5p14.1                   | 29,073,500  | 29,136,100  | 62,600     | 4             | loss | yes      | yes             | yes |                                                                     | 0.0%      |
| NAAR050-H5-HI2533     | 2          | 5   | 5p14.1                   | 29,073,500  | 29,136,100  | 62,600     | 4             | loss | yes      | yes             | yes |                                                                     | 0.0%      |
| NAAR075-F3-04C36242   | 1          | 5   | 5p13.3                   | 31,683,400  | 31,683,500  | 100        | 2             | loss |          |                 | yes |                                                                     | 0.2%      |
| NAAR030-C3-3179.006   | 1          | 5   | 5p13.3                   | 33,080,000  | 33,196,500  | 116,500    | 4             | gain |          |                 |     |                                                                     | 0.0%      |
| NAAR053-B12-HI0551    | 2          | 5   | 5p13.1                   | 39,193,600  | 40,355,600  | 1,162,000  | 14            | gain |          |                 |     | ERO1LB1[NM_019891                                                   | 0.0%      |
| NAAR003-D6-8056-201   | 1          | 5   | 5p13.1                   | 39,448,600  | 39,469,900  | 21,300     | 2             | gain |          |                 |     | MOV10L1[NM_018995                                                   | 0.0%      |
| NAAR031-G8-3214.004   | 1          | 5   | 5q13.3                   | 75,136,400  | 75,136,700  | 300        | 3             | loss |          |                 |     |                                                                     | 0.0%      |
| NAAR046-D1-01C08018   | 1          | 5   | 5q13.3                   | 75,136,400  | 75,136,700  | 300        | 3             | loss |          |                 |     | C18orf58[NM_173817                                                  | 0.0%      |
| NAAR077-H11-HI1824    | 4          | 5   | 5q21.2\15q21.1           | 102,457,000 | 103,447,000 | 990,000    | 5             | gain |          |                 | yes | SNRPN[NM_022806]\SNRPN[NM_022807]\UBE3A[NM_130839]\OCA2[NM_130839]  | 30.7%     |
| NAAR001-A9-8002-202   | 7          | 5   | 5q21.2                   | 103,669,000 | 104,188,000 | 519,000    | 3             | loss |          |                 | yes |                                                                     | 13.4%     |
| NAAR047-E4-01C08484   | 1          | 5   | 5q23.1                   | 117,078,000 | 119,691,000 | 2,613,000  | 17            | loss | yes      |                 | yes |                                                                     | 2.4%      |
| NAAR030-G7-3183.003   | 5          | 5   | 5q23.1\15q23.2           | 119,510,000 | 121,563,000 | 2,053,000  | 13            | gain |          |                 |     | VEGFC[NM_005429                                                     | 0.0%      |
| NAAR029-A9-3171.003   | 1          | 5   | 5q23.2                   | 125,468,000 | 125,556,000 | 88,000     | 5             | gain |          |                 | yes |                                                                     | 12.1%     |
| NAAR037-A5-1014-A5-P3 | 5          | 5   | 5q31.1                   | 132,594,000 | 134,866,000 | 2,272,000  | 12            | gain |          |                 | yes | DKFZp434N2030[NM_001009894]\KCNC2[NM_139136]\PPFIA2[NM_0036         | 5.7%      |
| NAAR064-H4-HI2135     | 2          | 5   | 5q35.2                   | 174,348,000 | 174,971,000 | 623,000    | 7             | gain |          |                 | yes |                                                                     | 100.0%    |
| NAAR027-E4-3118.003   | 1          | 6   | 6p25.3                   | 150,610     | 150,878     | 268        | 3             | loss |          |                 |     | TDRD3[NM_030794                                                     | 0.0%      |
| NAAR046-C9-01C08014   | 1          | 6   | 6p25.3                   | 150,610     | 150,878     | 268        | 3             | gain |          |                 | yes |                                                                     | 100.0%    |
| NAAR049-G4-HI2402     | 1          | 6   | 6p25.3                   | 150,610     | 150,878     | 268        | 3             | gain |          |                 | yes |                                                                     | 100.0%    |
| NAAR052-F3-HI0633     | 2          | 6   | 6p25.3\16p25.2\16p25.1   | 374,457     | 30,443,000  | 30,068,543 | 141           | loss | yes      |                 |     | CDH8[NM_001796                                                      | 0.0%      |
| NAAR055-A4-HI0442     | 1          | 6   | 6p25.2\16p25.1\16p24.3   | 3,801,430   | 18,594,500  | 14,793,070 | 67            | loss | yes      |                 | yes | HDAC11[NM_024827]\FBLN2[NM_001998]\FBLN2[NM_001004019]\NUP2         | 39.5%     |
| NAAR070-A12-04C29161  | 2          | 6   | 6p24.3                   | 7,456,900   | 7,595,230   | 138,330    | 2             | gain |          |                 |     | MMP15[NM_002428]\GPR56[NM_005682]\GPR56[NM_201525]\TEPPIN[M_201525] | 0.0%      |
| NAAR044-G5-01C06574   | 1          | 6   | 6p22.2                   | 25,282,000  | 25,382,600  | 100,600    | 4             | gain |          |                 | yes | GALNT1[NM_020474]\DTNA3[NM_032980]\DSC3[NM_024423]\DTNA3[NM_024423] | 14.9%     |
| NAAR041-A2-99C00465   | 4          | 6   | 6q14.1                   | 77,520,700  | 78,789,900  | 1,269,200  | 8             | gain |          |                 |     | COL15A1[NM_001855]\NR4A3[NM_006981]\C9orf21[NM_153698]\CTSL2[       | 0.0%      |
| NAAR066-F1-HI2710     | 2          | 6   | 6q14.1                   | 78,060,300  | 79,324,200  | 1,263,900  | 9             | gain |          |                 | yes | FHOD3[NM_025135                                                     | 100.0%    |
| NAAR024-E12-3073.004  | 1          | 6   | 6q16.1                   | 94,672,800  | 95,213,100  | 540,300    | 8             | loss |          |                 | yes | PPM2C[NM_018444]\NM_145269]\CDH17[NM_004063]\RBM12B[NM_203          | 8.3%      |
| NAAR041-A2-99C00465   | 6          | 6   | 6q16.3                   | 104,688,000 | 105,059,000 | 371,000    | 5             | gain |          |                 | yes | CTNNA1[NM_003798]\OR13D1[NM_001004448]\PTPN3[NM_002829]\FC          | 7.2%      |
| NAAR078-A3-200305415  | 9          | 6   | 6q16.3\16q21             | 104,688,000 | 112,813,000 | 8,125,000  | 29            | gain |          |                 | yes | HTR1B[NM_000863                                                     | 34.6%     |
| NAAR078-A3-200305415  | 9          | 6   | 6q21\16q22.1\16q22.2     | 113,107,000 | 121,399,000 | 8,292,000  | 40            | loss | yes      |                 |     |                                                                     | 0.0%      |
| NAAR078-A3-200305415  | 9          | 6   | 6q22.3\16q22.32\16q22.3  | 122,787,000 | 130,388,000 | 7,601,000  | 31            | loss | yes      |                 | yes | OPRK1[NM_000912                                                     | 8.4%      |
| NAAR078-A3-200305415  | 9          | 6   | 6q24.1                   | 139,167,000 | 142,639,000 | 3,472,000  | 12            | loss |          |                 |     | CDH4[NM_001794                                                      | 0.0%      |
| NAAR078-A3-200305415  | 9          | 6   | 6q24.2\16q24.3           | 144,964,000 | 148,225,000 | 3,261,000  | 18            | loss | yes      |                 |     | PDZK3[NM_015022]\PDZK3[NM_178140                                    | 0.0%      |
| NAAR078-A3-200305415  | 9          | 6   | 6q25.2                   | 153,246,000 | 154,205,000 | 959,000    | 8             | loss |          |                 |     |                                                                     | 0.0%      |
| NAAR078-A3-200305415  | 9          | 6   | 6q25.3                   | 156,077,000 | 158,058,000 | 1,981,000  | 12            | loss |          |                 |     |                                                                     | 0.0%      |
| NAAR067-F3-HI1481     | 4          | 6   | 6q25.3                   | 157,739,000 | 157,941,000 | 202,000    | 3             | gain |          |                 |     | GAB2[NM_012296]\GAB2[NM_080491                                      | 0.0%      |
| NAAR052-G9-HI1097     | 1          | 6   | 6q26                     | 163,090,000 | 163,493,000 | 403,000    | 4             | gain | yes      |                 | yes | PIPE[NM_006112]\CAP1[NM_006367]\RRAGC[NM_022157]\PPIE[NM_200        | 25.4%     |
| NAAR010-G1-8269-202   | 2          | 6   | 6q27                     | 165,016,000 | 165,037,000 | 21,000     | 3             | loss |          |                 |     | NOVA1[NM_006489]\NOVA1[NM_002515]\NOVA1[NM_006491                   | 11.4%     |
| NAAR078-A3-200305415  | 9          | 6   | 6q27                     | 165,016,000 | 167,022,000 | 2,006,000  | 13            | loss |          |                 |     |                                                                     | 78.3%     |
| NAAR047-H1-02C09502   | 8          | 7   | 7p21.3\17p21.2\17p21.1   | 11,993,100  | 17,334,000  | 5,340,900  | 20            | gain |          |                 | yes |                                                                     | 100.0%    |
| NAAR064-H2-HI2133     | 1          | 7   | 7p21.3                   | 12,577,400  | 12,826,100  | 248,700    | 5             | gain |          |                 | yes |                                                                     | 20.6%     |
| NAAR063-F4-HI1524     | 2          | 7   | 7p21.3\17p21.2           | 49,519,500  | 50,046,900  | 527,400    | 6             | gain | yes      |                 | yes |                                                                     | 20.6%     |
| NAAR064-A4-HI1686     | 1          | 7   | 7q21.11                  | 83,174,700  | 85,227,400  | 2,052,700  | 14            | loss | yes      | yes             |     | KIAA1559[NM_020917]\MGCG70924[NM_199285]\SYMFK[NM_004819]\ZN        | 21.1%     |
| NAAR059-G5-HI2100     | 1          | 7   | 7q21.13                  | 87,837,300  | 89,132,500  | 1,295,200  | 6             | gain |          |                 | yes | KCR1[NM_001013620]\CPNE8[NM_153634                                  | 90.1%     |
| NAAR061-A5-HI0128     | 1          | 7   | 7q31.32                  | 121,543,000 | 122,291,000 | 748,000    | 4             | loss | yes      | yes             |     | MMP15[NM_002428]\GPR56[NM_005682]\GPR56[NM_201525]\TEPPIN[M_201525] | 0.0%      |
| NAAR062-H3-HI1083     | 2          | 8   | 8p23.3\18p23.2\18p23.1   | 1,130,900   | 6,780,950   | 5,650,050  | 32            | loss |          |                 |     |                                                                     | 0.0%      |
| NAAR064-E5-HI1947     | 1          | 8   | 8p23.2                   | 3,909,530   | 4,949,310   | 1,039,780  | 12            | gain |          |                 | yes |                                                                     | 6.4%      |
| NAAR067-A8-HI2741     | 2          | 8   | 8p23.2                   | 3,909,530   | 3,909,710   | 180        | 2             | gain | yes      |                 | yes | C1D[NM_173177]\MEIS1[NM_002398]\PPP3R1[NM_000945]\LOC554251]        | 8.7%      |
| NAAR006-F6-8145-201   | 2          | 8   | 8p23.2                   | 4,473,850   | 5,900,610   | 1,426,760  | 13            | gain |          |                 | yes |                                                                     | 86.0%     |
| NAAR007-E6-8175-201   | 1          | 8   | 8p23.1                   | 8,160,870   | 11,422,100  | 3,261,230  | 11            | loss |          | yes             | yes | KRTHA7[NM_003770]\FLJ34306[NM_199340]\CD79B[NM_021602]\CASC         | 18.2%     |
| NAAR041-G2-00C04611   | 1          | 8   | 8p22                     | 13,570,600  | 14,168,200  | 597,600    | 7             | gain | yes      |                 | yes |                                                                     | 48.8%     |
| NAAR050-H10-HI2538    | 2          | 8   | 8q11.21                  | 50,311,400  | 50,549,200  | 237,800    | 2             | gain |          |                 | yes |                                                                     | 72.3%     |
| NAAR041-A2-99C00465   | 4          | 8   | 8q11.23                  | 54,253,900  | 54,663,300  | 409,400    | 5             | gain |          |                 | yes | CDC26[NM_139286]\HSDL2[NM_032303]\ASTN2[NM_198187]\WDR31[NM_198187] | 17.3%     |
| NAAR032-C11-3252.003  | 1          | 8   | 8q13.3                   | 70,795,900  | 72,139,600  | 1,343,700  | 9             | gain |          |                 |     |                                                                     | 0.0%      |
| NAAR073-A12-03C15260  | 1          | 8   | 8q22.1\18q22.2           | 97,006,400  | 99,137,500  | 2,131,100  | 6             | gain |          |                 |     |                                                                     | 0.0%      |
| NAAR052-F3-HI0633     | 2          | 8   | 8q22.3\18q23.2\18q23.1   | 104,786,000 | 142,072,000 | 37,286,000 | 139           | gain |          |                 |     | CDH8[NM_001796                                                      | 0.0%      |
| NAAR070-E3-HI3091     | 2          | 8   | 8q24.12                  | 120,513,000 | 122,308,000 | 1,795,000  | 7             | loss |          |                 |     |                                                                     | 0.0%      |
| NAAR035-G1-1014-G1-P1 | 1          | 8   | 8q24.22                  | 134,743,000 | 134,743,000 | 0          | 2             | gain |          |                 |     | KRTAP19-4[NM_181610]\KRTAP19-6[NM_181612]\KRTAP19-5[NM_1816         | 0.0%      |
| NAAR051-G11-02C12334  | 1          | 8   | 8q24.23                  | 137,820,000 | 137,859,000 | 39,000     | 2             | loss |          |                 | yes | GJA5[NM_005266]\CHD1L[NM_004284]\BCL9[NM_004326]\FMO5[NM_00         | 40.1%     |
| NAAR069-F6-HI2662     | 2          | 8   | 8q24.3                   | 142,072,000 | 142,072,000 | 0          | 2             | gain |          |                 | yes |                                                                     | 30.1%     |
| NAAR077-C8-04C37826   | 1          | 8   | 8q24.3                   | 142,072,000 | 142,072,000 | 0          | 2             | gain |          |                 |     |                                                                     | 0.0%      |
| NAAR027-A12-3129.004  | 1          | 9   | 9p24.3                   | 239,391     | 1,599,250   | 1,359,859  | 8             | gain |          |                 |     | C3orf32[NM_015931]\LOH3CR2A[NM_013343]\CAV3[NM_001234]\CAV3[        | 0.0%      |
| NAAR050-H5-HI2533     | 2          | 9   | 9p24.3                   | 239,391     | 559,992     | 320,601    | 5             | gain | yes      |                 | yes |                                                                     | 0.0%      |
| NAAR064-F6-HI2067     | 3          | 9   | 9p24.3\19p24.2\19p24.1   | 239,391     | 33,916,500  | 33,677,109 | 213           | gain | yes      |                 | yes |                                                                     | 100.0%    |
| NAAR065-B12-HI2269    | 3          | 9   | 9p24.3                   | 239,391     | 1,599,250   | 1,359,859  | 8             | gain |          |                 |     | CTNNA3[NM_013266]\LRRTM3[NM_178011                                  | 0.0%      |
| NAAR041-F10-00C04574  | 2          | 9   | 9p23                     | 11,611,200  | 12,277,900  | 666,700    | 10            | loss | yes      | yes             | yes |                                                                     | 100.0%    |
| NAAR065-B12-HI2269    | 3          | 9   | 9p23\19p22.3             | 11,611,200  | 14,481,300  | 2,870,100  | 31            | gain |          |                 |     | LOC51334[NM_016644                                                  | 0.0%      |
| NAAR052-H6-HI1012     | 1          | 9   | 9p23                     | 12,010,900  | 12,277,900  | 267,000    | 6             | loss |          | yes             | yes |                                                                     | 100.0%    |
| NAARCP2-A1-S-065-003  | 1          | 9   | 9p21.3                   | 23,996,000  | 23,996,300  | 300        | 3             | loss |          |                 |     | SGCG[NM_000231]\SPATA13[NM_153023]\SACS[NM_014363]\FLJ46358         | 0.0%      |
| NAAR065-B12-HI2269    | 3          | 9   | 9p21.1                   | 28,114,200  | 31,349,900  | 3,235,700  | 11            | gain |          |                 |     | LOC51334[NM_016644]\SRFBP1[NM_152546]\FTTMJ[NM_177478]\FLJ325       | 0.0%      |
| NAAR037-A9-1014-A9-P3 | 3          | 9   | 9p13.2                   | 38,017,600  | 38,288,600  | 271,000    | 4             | gain |          |                 | yes | KIAA1815[NM_024896]\UHRF2[NM_152306]\MJD2C[NM_015061]\MLAN          | 22.3%     |
| NAAR069-H9-04C29142   | 3          | 9   | 9p13.2                   | 38,017,600  | 38,288,600  | 271,000    | 4             | gain |          |                 |     | MMP15[NM_002428]\GPR56[NM_005682]\GPR56[NM_201525]\TEPPIN[M_201525] | 0.0%      |
| NAAR064-F6-HI2067     | 3          | 9   | 9q21.1\19q21.12\19q21.11 | 70,403,200  | 90,734,300  | 20,331,100 | 84            | gain |          |                 |     | CTNNA3[NM_013266]\LRRTM3[NM_178011                                  | 0.0%      |
| NAAR022-H7-3019.003   | 1          | 9   | 9q21.12\19q2             |             |             |            |               |      |          |                 |     |                                                                     |           |

| Sample ID               | CNV/sample | Chr | Cytoband             | Start       | Stop        | Size        | #SNPs/segment | CNV  | Familial | Mendelian error | dGV | RefGene                                                      | % overlap |
|-------------------------|------------|-----|----------------------|-------------|-------------|-------------|---------------|------|----------|-----------------|-----|--------------------------------------------------------------|-----------|
| NAAR065-F2-HI0182       | 1          | 10  | 10p13                | 13,087,500  | 13,302,400  | 214,900     | 4             | loss | yes      | yes             | yes | FHOD3 NM_025135                                              | 100.0%    |
| NAAR060-A7-HI2165       | 1          | 10  | 10q11.22 10q11.23    | 49,217,200  | 50,638,800  | 1,421,600   | 14            | gain | yes      |                 | yes | DSG4 NM_177986 DSG2 NM_001943 B4GALT6 NM_004775 DSG3 NM      | 0.2%      |
| NAAR043-H10-01C06237    | 1          | 10  | 10q21.1              | 59,937,900  | 59,938,400  | 500         | 3             | loss | yes      |                 |     | TRPM3 NM_206946 TRPM3 NM_206944 TRPM3 NM_020952 TRPM3 N      | 0.0%      |
| NAAR057-C7-HI1208       | 1          | 10  | 10q21.3              | 64,337,400  | 66,264,700  | 1,927,300   | 9             | gain |          |                 |     |                                                              | 0.0%      |
| NAAR044-H5-01C06591     | 1          | 10  | 10q22.1 10q22.2 10q  | 67,889,900  | 133,793,000 | 65,903,100  | 258           | gain |          |                 | yes | CDH19 NM_021153 CDH7 NM_033646 SERPINB8 NM_001031848 C18     | 16.4%     |
| NAAR030-G10-3194.003    | 1          | 10  | 10q21.3              | 68,424,900  | 68,552,100  | 127,200     | 6             | gain | yes      |                 |     |                                                              | 100.0%    |
| NAAR047-H1-02C09502     | 8          | 10  | 10q23.31 10q23.32    | 92,008,800  | 93,008,000  | 999,200     | 7             | gain |          |                 | yes | SNRPN NM_022806 SNRPN NM_022807 UBE3A NM_130839 OCA2 NM      | 31.6%     |
| NAAR057-F1-HI1281       | 2          | 10  | 10q23.31 10q23.32    | 92,008,800  | 93,008,000  | 999,200     | 7             | gain |          |                 | yes | PMP22 NM_153322 FLJ45831 NM_001001684 TEKT3 NM_031898 PMF    | 100.0%    |
| NAAR077-E7-05C39675     | 6          | 10  | 10q23.31 10q23.32    | 92,152,400  | 93,008,000  | 855,600     | 5             | gain |          |                 |     | SHBINM_003028                                                | 0.0%      |
| NAAR020-F12-HI1566      | 3          | 10  | 10q25.1              | 110,441,000 | 111,091,000 | 650,000     | 4             | loss |          |                 | yes | CSMD1 NM_033225                                              | 100.0%    |
| NAAR050-H11-HI2539      | 2          | 10  | 10q26.2              | 127,758,000 | 127,758,000 | 0           | 3             | gain |          |                 | yes | SYNE2 NM_182914 ZFVYVE26 NM_015346 SYNE2 NM_182910 SYNE2     | 0.5%      |
| NAAR074-D9-04C35709     | 1          | 11  | 11p15.2              | 15,182,800  | 15,182,900  | 100         | 2             | loss |          |                 | yes | GPR65 NM_003608 GALC NM_000153                               | 32.7%     |
| NAAR001-C2-8006-202     | 1          | 11  | 11p15.1              | 18,048,100  | 18,048,400  | 300         | 2             | loss |          |                 |     |                                                              | 0.0%      |
| NAAR076-G4-04C37169     | 1          | 11  | 11p14.3              | 21,709,100  | 21,709,300  | 200         | 3             | gain | yes      |                 |     | HABP2 NM_004132                                              | 0.0%      |
| NAAR076-G5-04C37170     | 1          | 11  | 11p14.3              | 21,709,100  | 21,709,300  | 200         | 3             | gain | yes      |                 | yes | MGC40069 NM_182615                                           | 34.4%     |
| NAAR001-A9-8002-202     | 7          | 11  | 11p14.3              | 22,349,700  | 22,375,100  | 25,400      | 4             | loss |          |                 |     | SLC17A6 NM_020346                                            | 0.0%      |
| NAAR010-E1-8264-201     | 2          | 11  | 11p13                | 34,393,300  | 34,576,200  | 182,900     | 4             | gain |          |                 |     | OLFM3 NM_058170                                              | 0.0%      |
| NAAR066-A7-HI0151       | 1          | 11  | 11p13                | 36,163,200  | 36,163,400  | 200         | 3             | loss |          |                 | yes | GABRG3 NM_033223                                             | 6.3%      |
| NAAR063-B1-HI1183_2     | 2          | 11  | 11p11.2              | 48,014,900  | 48,704,500  | 689,600     | 4             | gain |          |                 |     | SFRS4 NM_005626 PTPRU NM_005704 MECR NM_001024732 EPB41      | 0.0%      |
| NAAR068-E11-HI2859      | 2          | 11  | 11p11.12             | 49,879,900  | 50,595,000  | 715,100     | 7             | gain | yes      |                 | yes | TRAM1 NM_014294 IPRDM14 NM_024504 XKR9 NM_001011720 SLCO     | 1.1%      |
| NAAR056-C2-HI0799       | 1          | 11  | 11p11.12             | 50,096,900  | 50,595,000  | 498,100     | 6             | gain | yes      |                 |     |                                                              | 0.0%      |
| NAAR068-F2-HI2862       | 2          | 11  | 11p11.12             | 50,096,900  | 50,595,000  | 498,100     | 6             | gain | yes      |                 |     |                                                              | 0.0%      |
| NAAR001-A9-8002-202     | 7          | 11  | 11p11.12             | 50,418,000  | 50,595,000  | 177,000     | 3             | loss |          |                 | yes |                                                              | 100.0%    |
| NAAR020-F12-HI1566      | 3          | 11  | 11p11.12             | 50,418,000  | 50,595,000  | 177,000     | 3             | loss |          |                 |     | SNX14 NM_020468 INT5E NM_002526 SYNCRIP NM_006372 SNX14 N    | 0.0%      |
| NAAR074-C12-04C35700    | 1          | 11  | 11p11.12             | 51,247,900  | 51,319,500  | 71,600      | 4             | gain |          |                 |     |                                                              | 0.0%      |
| NAAR001-F11-8017-202    | 3          | 11  | 11q14.1              | 77,603,900  | 77,613,800  | 9,900       | 3             | loss |          | yes             | yes | PMP22 NM_153322 PMP22 NM_000304 TEKT3 NM_031898 FLJ45831     | 100.0%    |
| NAAR026-G7-3105.004     | 1          | 11  | 11q22.3              | 103,005,000 | 103,045,000 | 40,000      | 5             | loss |          | yes             |     | C3orf32 NM_015931 LOH3CR2A NM_013343 CAV3 NM_001234 CAV3 I   | 0.0%      |
| NAAR063-B3-HI1190       | 1          | 11  | 11q22.3              | 103,928,000 | 104,733,000 | 805,000     | 8             | gain | yes      |                 |     |                                                              | 0.0%      |
| NAAR057-E5-HI1258       | 1          | 11  | 11q23.2 11q23.3 11q  | 113,502,000 | 134,403,000 | 20,901,000  | 95            | gain |          |                 |     |                                                              | 0.0%      |
| NAARCP2-A7-S-082-003    | 1          | 11  | 11q25                | 133,403,000 | 134,403,000 | 1,000,000   | 5             | gain |          |                 | yes |                                                              | 76.9%     |
| NAAR035-E11-1014-E11-P1 | 1          | 11  | 11q25                | 134,083,000 | 134,403,000 | 320,000     | 4             | gain |          |                 | yes | PSG7 NM_002783 PSG1 NM_006905 PSG6 NM_001031850 PSG6 NM      | 100.0%    |
| NAAR024-E10-3070.004    | 1          | 11  | 11q25                | 134,394,000 | 134,403,000 | 9,000       | 3             | gain |          |                 | yes | SHOX2 NM_006884 TIPARP NM_015508 FLJ16641 NM_001004316 SS    | 8.6%      |
| NAAR060-C5-HI2203       | 1          | 12  | 12q24.12 12p13.33    | 93,683      | 130,547,000 | 130,453,317 | 476           | gain |          |                 | yes | FLJ16171 NM_001004348 DRD1 NM_000794 SFXN1 NM_022754         | 15.2%     |
| NAAR047-E5-01C08485     | 1          | 12  | 12p11.23             | 27,470,200  | 27,495,700  | 25,500      | 3             | gain | yes      |                 |     |                                                              | 57.5%     |
| NAAR028-D6-3139.003     | 1          | 12  | 12q11 12q12          | 36,491,900  | 37,417,300  | 925,400     | 12            | gain |          |                 | yes |                                                              | 24.9%     |
| NAAR001-A9-8002-202     | 7          | 12  | 12q12                | 36,506,000  | 37,162,800  | 656,800     | 10            | loss |          |                 | yes | KCR1 NM_001013620                                            | 100.0%    |
| NAAR004-B12-9080-201    | 2          | 12  | 12q12                | 36,506,000  | 36,697,300  | 191,300     | 7             | loss |          |                 |     | KIFC3 NM_005550 MMP15 NM_002428 GPR56 NM_005682 TEPP NM      | 0.0%      |
| NAAR020-F12-HI1566      | 3          | 12  | 12q12                | 36,694,800  | 36,697,300  | 2,500       | 3             | loss |          |                 |     |                                                              | 0.0%      |
| NAAR052-F6-HI0682       | 3          | 12  | 12q24.12 12q13.11    | 44,378,200  | 130,547,000 | 86,168,200  | 321           | gain | yes      | yes             |     |                                                              | 0.0%      |
| NAAR033-G1-3258.004     | 1          | 12  | 12q14.1              | 58,858,000  | 59,736,400  | 878,400     | 4             | loss | yes      | yes             |     | HRASLS NM_020386 OPA1 NM_130837 OPA1 NM_130831 ATP13A4 N     | 36.4%     |
| NAAR001-A9-8002-202     | 7          | 12  | 12q21.1              | 71,222,200  | 71,727,000  | 504,800     | 3             | loss |          |                 | yes | TRHDE NM_013381                                              | 60.0%     |
| NAAR028-C3-3133.003     | 1          | 12  | 12q24.33             | 128,620,000 | 128,999,000 | 379,000     | 4             | gain |          |                 |     | CAT NM_001752 ELF5 NM_001422 ELF5 NM_198381                  | 0.0%      |
| NAAR041-F10-00C04574    | 2          | 13  | 13q12.12             | 22,502,100  | 23,692,300  | 1,190,200   | 9             | gain | yes      |                 | yes | CASP4 NM_033306 COP1 NM_052889 CASP1 NM_033292 CASP1 NM      | 24.8%     |
| NAAR051-G1-HI2618       | 1          | 13  | 13q12.12             | 22,502,100  | 23,692,300  | 1,190,200   | 9             | gain |          |                 |     |                                                              | 0.0%      |
| NAAR047-H1-02C09502     | 8          | 13  | 13q13.1 13q13.2      | 32,884,200  | 33,883,200  | 999,000     | 6             | gain |          |                 | yes |                                                              | 72.3%     |
| NAAR054-F3-HI0298       | 1          | 13  | 13q14.2              | 47,048,100  | 47,569,100  | 521,000     | 8             | gain | yes      |                 |     |                                                              | 0.0%      |
| NAAR054-F4-HI0299       | 1          | 13  | 13q14.2              | 47,048,100  | 47,569,100  | 521,000     | 8             | gain | yes      |                 |     |                                                              | 0.0%      |
| NAAR031-G7-3212.003     | 1          | 13  | 13q21.31 13q21.32    | 63,529,600  | 65,319,400  | 1,789,800   | 9             | gain | yes      |                 | yes |                                                              | 100.0%    |
| NAAR044-C5-01C06331     | 1          | 13  | 13q21.32             | 65,120,700  | 65,951,300  | 830,600     | 5             | gain | yes      |                 | yes | C1orf58 NM_173817 KIAA1772 NM_024935 MGCG26718 NM_00102999   | 22.3%     |
| NAAR072-F11-200501053   | 3          | 13  | 13q31.1              | 80,722,400  | 82,292,200  | 1,569,800   | 9             | gain |          |                 |     |                                                              | 0.0%      |
| NAAR047-H1-02C09502     | 8          | 13  | 13q31.1              | 83,604,500  | 84,667,000  | 1,062,500   | 6             | gain |          |                 | yes |                                                              | 100.0%    |
| NAAR072-F11-200501053   | 3          | 13  | 13q33.1 13q33.2      | 103,629,000 | 104,277,000 | 648,000     | 7             | loss |          |                 | yes | ACOXL NM_018308 BCL2L1 NM_138624 BCL2L1 NM_138621 BCL2L      | 100.0%    |
| NAAR036-E10-1014-E10-P2 | 3          | 14  | 14q11.2              | 21,305,700  | 21,719,200  | 413,500     | 9             | gain |          |                 |     | PACRG NM_152410                                              | 0.0%      |
| NAAR038-D6-1015-D6-P1   | 1          | 14  | 14q11.2              | 21,305,700  | 21,719,200  | 413,500     | 9             | gain |          |                 | yes | C9orf72 NM_018325 C9orf72 NM_145005 C9orf82 NM_024828 ELAVL2 | 13.8%     |
| NAAR010-E1-8264-201     | 2          | 14  | 14q12                | 24,835,400  | 25,548,500  | 713,100     | 6             | gain |          |                 |     | DAB2 NM_001343                                               | 0.0%      |
| NAAR063-F7-HI1544       | 1          | 14  | 14q23.2 14q23.3      | 61,897,100  | 65,075,600  | 3,178,500   | 11            | gain |          |                 | yes | NDUFA11 NM_175614 ZNF441 NM_152355 TICAM1 NM_182919 FLJ39C   | 9.8%      |
| NAAR063-E9-HI1500       | 1          | 14  | 14q31.1 14q31.2 14q  | 80,741,900  | 87,019,000  | 6,277,100   | 43            | gain |          |                 | yes | MRPL40 NM_003776 CLTCL1 NM_007098 UFD1L NM_001035247 VDC     | 20.7%     |
| NAAR002-B3-8026-204     | 2          | 15  | 15q11.2              | 21,490,300  | 22,083,700  | 593,400     | 9             | gain |          |                 |     |                                                              | 0.0%      |
| NAAR024-B7-3064.003     | 1          | 15  | 15q11.2 15q12        | 21,490,300  | 25,698,400  | 4,208,100   | 18            | gain | yes      |                 | yes | GJA5 NM_005266 CHD1L NM_004284 BCL9 NM_004326 FMO5 NM_00     | 33.6%     |
| NAAR024-C7-3064.004     | 1          | 15  | 15q11.2 15q12        | 21,490,300  | 25,698,400  | 4,208,100   | 18            | gain | yes      |                 | yes | TNKS1 NM_003747 THEX1 NM_153332 XKR6 NM_173683 MFHAS1 NM     | 9.6%      |
| NAAR039-C9-1021-C9-P3   | 2          | 15  | 15q11.2 15q12        | 21,490,300  | 25,698,400  | 4,208,100   | 18            | gain |          |                 | yes | ZA20D2 NM_006007 LOC401507 NM_001012278_copy_2 GBA2 NM_02    | 27.4%     |
| NAAR039-E9-1012-F2-PA   | 1          | 15  | 15q11.2 15q12        | 21,490,300  | 25,698,400  | 4,208,100   | 18            | gain |          |                 | yes | SLC28A3 NM_022127 HNRPK NM_002140 HNRPK NM_031263 FRMDC      | 14.5%     |
| NAAR065-E6-HI0302       | 1          | 15  | 15q11.2 15q12        | 21,490,300  | 25,698,400  | 4,208,100   | 18            | gain | yes      |                 | yes |                                                              | 20.6%     |
| NAAR065-E7-HI0304       | 1          | 15  | 15q11.2 15q12        | 21,490,300  | 25,698,400  | 4,208,100   | 18            | gain | yes      |                 | yes |                                                              | 94.8%     |
| NAAR015-C12-F-016-003   | 1          | 15  | 15q11.2              | 21,885,600  | 22,083,700  | 198,100     | 6             | gain |          |                 | yes | C1orf11 NM_182581 NOS1AP NM_014697                           | 100.0%    |
| NAAR052-E6-HI0308       | 1          | 15  | 15q12                | 23,325,300  | 24,495,700  | 1,170,400   | 4             | gain |          |                 | yes | ACOXL NM_018308 BCL2L1 NM_138624 BCL2L1 NM_138621 BCL2L      | 100.0%    |
| NAAR078-A3-200305415    | 9          | 15  | 15q22.1 15q22.33 15q | 49,345,700  | 100,170,000 | 50,824,300  | 190           | gain |          | yes             |     | SGCG NM_000231 SPATA13 NM_153023 SACS NM_014363 FLJ46358     | 0.0%      |
| NAAR007-C5-8168-202     | 1          | 15  | 15q22.2              | 57,930,400  | 58,146,000  | 215,600     | 4             | gain |          |                 | yes |                                                              | 100.0%    |
| NAAR055-A4-HI0442       | 2          | 15  | 15q24.2 15q24.3 15q  | 74,290,400  | 100,170,000 | 25,879,600  | 104           | gain |          |                 | yes |                                                              | 100.0%    |
| NAAR070-E3-HI3091       | 2          | 16  | 16p13.2              | 7,668,760   | 8,435,410   | 766,650     | 8             | loss |          |                 |     | APIN NM_017855 C4orf7 NM_152997 CNS3 NM_005212               | 0.0%      |
| NAAR075-E1-04C36221     | 2          | 16  | 16p13.2              | 7,668,760   | 8,435,410   | 766,650</   |               |      |          |                 |     |                                                              |           |

| Sample ID               | CNV/sample | Chr | Cytoband                | Start      | Stop       | Size       | #SNPs/segment | CNV  | Familial | Mendelian error | dGV | RefGene                                                                                                                         | % overlap |
|-------------------------|------------|-----|-------------------------|------------|------------|------------|---------------|------|----------|-----------------|-----|---------------------------------------------------------------------------------------------------------------------------------|-----------|
| NAAR017-D4-HI2243       | 1          | 16  | 16q23.3                 | 81,327,500 | 82,050,200 | 722,700    | 5             | gain |          |                 |     |                                                                                                                                 | 0.0%      |
| NAAR068-B12-HI1404      | 2          | 17  | 17p12                   | 14,304,400 | 15,237,700 | 933,300    | 10            | gain | yes      |                 |     |                                                                                                                                 | 0.0%      |
| NAAR001-E1-8012-201     | 1          | 17  | 17p12                   | 14,432,900 | 15,237,700 | 804,800    | 9             | loss | yes      | yes             | yes |                                                                                                                                 | 0.7%      |
| NAAR045-A5-01C06730     | 3          | 17  | 17p12                   | 14,691,500 | 15,108,700 | 417,200    | 4             | gain |          |                 | yes | ACOXL NM_018308 BCL2L1 NM_138624 BCL2L1 NM_138621 BCL2L1                                                                        | 100.0%    |
| NAAR003-A5-8047-202     | 4          | 17  | 17q21.1 17q25.2 17q25.3 | 33,248,900 | 76,399,500 | 43,150,600 | 88            | gain |          | yes             |     |                                                                                                                                 | 0.0%      |
| NAAR067-D12-HI2767      | 2          | 18  | 18p11.32                | 1,564,270  | 1,964,310  | 400,040    | 10            | gain | yes      |                 | yes |                                                                                                                                 | 69.2%     |
| NAAR076-D4-04C36611     | 1          | 18  | 18p11.32                | 1,748,000  | 1,807,190  | 59,190     | 4             | loss |          |                 |     | SHB NM_003028                                                                                                                   | 0.0%      |
| NAAR022-A10-3023.004    | 1          | 18  | 18p11.21 18p11.22       | 10,741,600 | 11,601,400 | 859,800    | 7             | gain | yes      |                 | yes | SUCLG2 NM_003848 FAM19A4 NM_001005527 FAM19A1 NM_213609 FAM19A1                                                                 | 2.1%      |
| NAAR022-H9-3023.003     | 1          | 18  | 18p11.21 18p11.22       | 10,741,600 | 11,601,400 | 859,800    | 7             | gain | yes      |                 |     | FOXB1 NM_012182                                                                                                                 | 0.0%      |
| NAAR001-F11-8017-202    | 3          | 18  | 18p11.21                | 11,554,300 | 11,601,400 | 47,100     | 3             | loss |          |                 | yes | PMP22 NM_153322 PMP22 NM_000304 TEKT3 NM_031898 FLJ45831 PMP22                                                                  | 100.0%    |
| NAAR036-E10-1014-E10-P2 | 3          | 18  | 18q11.2                 | 18,307,400 | 18,529,700 | 222,300    | 4             | gain |          |                 | yes | CAPZA3 NM_033328 PLCZ1 NM_033123 PIK3C2G NM_004570 AEBP2 GAB2 NM_012296 GAB2 NM_080491                                          | 2.5%      |
| NAAR050-H11-HI2539      | 2          | 18  | 18q11.2                 | 18,307,400 | 18,529,700 | 222,300    | 4             | gain |          |                 |     |                                                                                                                                 | 0.0%      |
| NAAR058-D6-HI1540       | 6          | 18  | 18q11.2                 | 18,307,400 | 18,529,700 | 222,300    | 4             | gain |          |                 | yes | PMP22 NM_153322 FLJ45831 NM_001001684 TEKT3 NM_031898 PMF KRTAP19-4 NM_181610 KRTAP19-6 NM_181612 KRTAP19-5 NM_181613 KRTAP19-4 | 100.0%    |
| NAAR036-B11-1014-B11-P2 | 1          | 18  | 18q12.2 18q12.3         | 34,993,000 | 35,619,700 | 626,700    | 5             | loss | yes      | yes             |     |                                                                                                                                 | 0.0%      |
| NAAR020-B4-HI0937       | 1          | 19  | 19q12                   | 32,869,600 | 33,398,500 | 528,900    | 7             | gain |          |                 | yes | ATP5J NM_001003696 CRYZL1 NM_145858 CLDN14 NM_144492 C21C1 ATP5J                                                                | 10.8%     |
| NAAR071-F1-04C33149     | 1          | 19  | 19q13.11                | 37,946,700 | 39,375,900 | 1,429,200  | 8             | gain |          |                 | yes |                                                                                                                                 | 0.3%      |
| NAAR041-G7-01C05468     | 2          | 20  | 20p13                   | 95,685     | 691,220    | 595,535    | 4             | gain | yes      |                 | yes |                                                                                                                                 | 100.0%    |
| NAAR041-A2-99C00465     | 4          | 20  | 20q13.33                | 59,180,200 | 59,682,100 | 501,900    | 5             | gain |          |                 | yes | SLC27A4 NM_005094 C5 NM_001735 CDK9 NM_001261 RAPGEF1 NM_001735                                                                 | 11.0%     |
| NAAR010-H3-8273-202     | 1          | 21  | 21q11.2                 | 13,520,500 | 13,574,800 | 54,300     | 2             | gain |          |                 | yes |                                                                                                                                 | 100.0%    |
| NAAR017-C2-HI2202       | 1          | 21  | 21q22.11                | 30,538,900 | 30,983,100 | 444,200    | 8             | gain | yes      |                 | yes | C2orf10 NM_194250                                                                                                               | 9.2%      |
| NAAR069-A4-HI2923       | 1          | 21  | 21q22.3                 | 46,751,900 | 46,782,200 | 30,300     | 2             | gain |          |                 | yes |                                                                                                                                 | 6.8%      |
| NAAR030-C8-3183.007     | 1          | 22  | 22q11.21                | 17,506,900 | 19,774,000 | 2,267,100  | 4             | loss |          |                 | yes |                                                                                                                                 | 18.1%     |
| NAAR063-B1-HI1183_2     | 2          | 22  | 22q11.21                | 17,506,900 | 20,306,800 | 2,799,900  | 5             | gain | yes      |                 | yes | NDUFA11 NM_175614 ZNF441 NM_152355 TICAM1 NM_182919 FLJ90 NDUFA11                                                               | 10.2%     |
| NAAR074-A11-04C35671    | 2          | 22  | 22q12.1                 | 26,638,100 | 27,802,400 | 1,164,300  | 4             | gain |          |                 |     |                                                                                                                                 | 0.0%      |
| NAAR001-G4-8018-201     | 1          | 22  | 22q13.32 22q13.33       | 47,765,700 | 48,006,700 | 241,000    | 3             | loss |          |                 |     | GAB2 NM_080491 GAB2 NM_012296                                                                                                   | 0.0%      |
| NAAR053-F1-03C15328     | 1          | 22  | 22q13.32 22q13.33       | 48,004,600 | 48,881,300 | 876,700    | 4             | loss | yes      | yes             | yes |                                                                                                                                 | 19.2%     |
| NAAR072-F11-200501053   | 3          | 22  | 22q13.32 22q13.33       | 48,004,600 | 48,881,300 | 876,700    | 4             | loss | yes      | yes             | yes |                                                                                                                                 | 19.2%     |
| NAAR002-B3-8026-204     | 2          | 22  | 22q13.33                | 48,881,000 | 48,881,300 | 300        | 2             | gain |          |                 | yes |                                                                                                                                 | 100.0%    |
