# Supplementary material for: Mapping autism risk loci using genetic linkage and chromosomal rearrangements
Source: Springer Nature journal article supplement (doi:10.1038/ng1985), 2007-02-18
Supplement: ng1985-S8.pdf [file ng1985-S8.pdf]

**Mapping autism risk loci using genetic linkage and chromosomal rearrangements** (The Autism Genome Project (AGP) Consortium)

**Supplementary Table 4. List of Validated CNVs.**

Supplementary Table 7: List of Validated CNVs (NCBI Build 35)

List of Validated CNVs in Batch Analysis

| SCAN ID                 | Family ID | Invd ID   | chr   | cytoband           | start       | stop        | size        | cnv (loss/gain) | Validation                |
|-------------------------|-----------|-----------|-------|--------------------|-------------|-------------|-------------|-----------------|---------------------------|
| NAAR030-E12-3198.003    |           | 3198      | 3     | 1 p36.11;p35.3:    | 24,939,600  | 30,896,500  | 5,956,900   | gain            | Familial                  |
| NAAR030-F12-3198.004    |           | 3198      | 4     | 1 p36.11;p35.3:    | 25,148,200  | 30,896,500  | 5,748,300   | gain            | Familial                  |
| NAAR047-C10-C08464      |           | 1116;7101 | 4,7   | 1 p35.2            | 30,265,700  | 30,896,500  | 630,800     | loss            | Familial                  |
| NAAR047-C8-01C08462     |           | 1116;7101 | 1,1   | 1 p35.2            | 30,265,700  | 30,896,500  | 630,800     | loss            | Familial                  |
| NAAR060-G3-H1233        |           | 7101;1116 | 1,1   | 1 p35.2            | 30,265,700  | 30,896,500  | 630,800     | loss            | Familial                  |
| NAAR074-C3-0C35691      |           | 5116      | 1     | 1 p32.1;p31.3      | 60,055,100  | 61,350,000  | 1,294,900   | gain            | Familial                  |
| NAAR074-D1-04C35701     |           | 5116      | 4     | 1 p31.3            | 60,389,500  | 61,350,000  | 960,500     | gain            | Familial                  |
| NAAR036-D12-1014-D12-P2 |           | 3178      | 6     | 1 p31.1            | 82,453,300  | 83,282,300  | 829,000     | gain            | Mendelian Error           |
| NAAR024-A12-3072.008    |           | 3072      | 8     | 1 p21.1            | 105,739,000 | 105,801,000 | 62,000      | gain            | Familial                  |
| NAAR024-G11-3072.006    |           | 3072      | 6     | 1 p21.1            | 105,739,000 | 105,801,000 | 62,000      | gain            | Familial                  |
| NAAR007-D4-8172-111     |           | 8172      | 11    | 1 p21.1            | 143,780,000 | 144,894,000 | 1,114,000   | gain            | Familial                  |
| NAAR007-D5-8172-201     |           | 8172      | 205   | 1 p21.1            | 143,780,000 | 144,894,000 | 1,114,000   | gain            | Familial                  |
| NAAR007-D6-8172-202     |           | 8172      | 202   | 1 p21.1            | 143,780,000 | 144,894,000 | 1,114,000   | gain            | Familial                  |
| NAAR070-D8-H1079        |           | 1425      | 301   | 1 p21.1            | 143,780,000 | 144,894,000 | 1,114,000   | loss            | Mendelian Error           |
| NAAR007-A4-AU2201       |           | 8156      | 101   | 1 p23.3            | 158,901,000 | 159,599,000 | 698,000     | gain            | Familial                  |
| NAAR007-A8-8156-203     |           | 8156      | 203   | 1 p23.3            | 158,901,000 | 159,599,000 | 698,000     | gain            | Familial                  |
| NAAR029-E10-3172.009    |           | 3172      | 9     | 1 p23.3            | 158,901,000 | 159,599,000 | 698,000     | gain            | Familial                  |
| NAAR029-E9-3172.001     |           | 3172      | 1     | 1 p23.3            | 158,901,000 | 159,036,000 | 135,000     | gain            | Familial                  |
| NAAR029-F9-3172.002     |           | 3172      | 2     | 1 p23.3            | 158,901,000 | 159,036,000 | 135,000     | gain            | Familial                  |
| NAAR064-H3-H12134       |           | 1321      | 2     | 1 p23.3            | 158,901,000 | 159,599,000 | 698,000     | gain            | Familial                  |
| NAAR064-H4-H12135       |           | 1321      | 5     | 1 p23.3            | 158,901,000 | 159,036,000 | 135,000     | gain            | Familial                  |
| NAAR058-E4-H1581        |           | 1288      | 4     | 1 p31.1            | 185,134,000 | 185,838,000 | 704,000     | loss            | Mendelian Error           |
| NAAR055-C12-H10556      |           | 1168      | 1     | 1 p42.3            | 232,746,000 | 232,746,000 | 1,000       | loss            | Familial                  |
| NAAR055-D1-H10557       |           | 1168      | 2     | 1 p42.3            | 232,746,000 | 232,746,000 | 1,000       | loss            | Familial                  |
| NAAR055-D2-H10560       |           | 1168      | 3     | 1 p42.3            | 232,746,000 | 232,746,000 | 1,000       | loss            | Familial                  |
| NAAR067-D6-H12761       |           | 1410      | 303   | 1 p42.3            | 232,746,000 | 232,746,000 | 1,000       | loss            | Familial                  |
| NAAR067-D7-H12762       |           | 1410      | 301   | 1 p42.3            | 232,746,000 | 232,746,000 | 1,000       | loss            | Familial                  |
| NAAR012-G3-19-961040    |           | 4011      | 1     | 2 p36.2;p25.3;2j   | 157,739     | 240,643,000 | 240,485,261 | gain            | Familial, Mendelian Error |
| NAAR001-A2-8001-111     |           | 8001      | 111   | 2 2p24.3           | 14,316,000  | 15,674,900  | 1,358,900   | gain            | Familial                  |
| NAAR001-A3-8001-202     |           | 8001      | 202   | 2 2p24.3           | 14,316,000  | 15,674,900  | 1,358,900   | gain            | Familial                  |
| NAAR023-B10-3047.004    |           | 3047      | 4     | 2 2p24.2           | 17,113,300  | 17,558,400  | 445,100     | loss            | Familial                  |
| NAAR023-C10-3047.005    |           | 3047      | 5     | 2 2p24.2           | 17,284,200  | 17,558,400  | 274,200     | loss            | Familial                  |
| NAAR032-E1-3222.002     |           | 3222      | 2     | 2 2p24.1           | 19,980,700  | 21,966,300  | 1,985,600   | gain            | Familial                  |
| NAAR032-F1-3222.003     |           | 3222      | 3     | 2 2p24.1           | 19,980,700  | 23,634,900  | 3,654,200   | gain            | Familial                  |
| NAAR032-G1-3222.004     |           | 3222      | 4     | 2 2p24.1           | 19,980,700  | 23,634,900  | 3,654,200   | gain            | Familial                  |
| NAAR049-C11-42C10134    |           | 8122;1295 | 2     | 2 1p16.3           | 50,430,000  | 50,785,300  | 355,300     | loss            | QPCR, min.sat             |
| NAAR064-C2-H11745       |           | 8122;1295 | 203,3 | 2 1p16.3           | 106,322,000 | 106,322,000 | 750,000     | loss            | Mendelian Error           |
| NAAR052-C12-03C13728    |           | 2015      | 2     | 2 2q14.3;2q21.1;2j | 129,275,000 | 149,814,000 | 20,539,000  | gain            | Familial                  |
| NAAR006-A3-8125-201     |           | 8125      | 201   | 2 2q32.1           | 184,623,000 | 186,335,000 | 1,712,000   | gain            | Familial                  |
| NAAR006-A4-8125-202     |           | 8125      | 202   | 2 2q32.1           | 184,623,000 | 186,335,000 | 1,712,000   | gain            | Familial                  |
| NAAR001-D7-8011-111     |           | 8011      | 111   | 2 2q36.1           | 224,192,000 | 224,192,000 | 0           | loss            | Familial                  |
| NAAR001-D9-8011-202     |           | 8011      | 202   | 2 2q36.1           | 224,192,000 | 224,192,000 | 0           | loss            | Familial                  |
| NAAR007-B2-8159-101     |           | 8159      | 101   | 3 3p14.1           | 67,773,300  | 68,967,900  | 1,194,600   | loss            | Familial                  |
| NAAR007-B4-AU32503      |           | 8159      | 201   | 3 3p14.1           | 67,773,300  | 68,967,900  | 1,194,600   | loss            | Familial, Mendelian Error |
| NAAR007-B6-8159-203     |           | 8159      | 203   | 3 3p14.1           | 67,773,300  | 68,967,900  | 1,194,600   | loss            | Familial, Mendelian Error |
| NAAR030-F9-3192.001     |           | 3192      | 1     | 3 3p12.2           | 82,496,200  | 83,190,200  | 694,000     | gain            | Familial                  |
| NAAR037-A9-1014-A9-P3   |           | 3192      | 4     | 3 3p12.2           | 82,496,200  | 83,190,200  | 694,000     | gain            | Familial, Mendelian Error |
| NAAR048-D2-02C10148     |           | 9043      | 4     | 3 3p12.2           | 82,496,200  | 82,849,700  | 353,500     | loss            | Familial                  |
| NAAR049-D1-02C10136     |           | 9043      | 5     | 3 3p12.2           | 82,496,200  | 82,849,700  | 353,500     | loss            | Familial                  |
| NAAR072-G5-H10615       |           | 1023      | 8     | 3 3p13.31          | 117,973,000 | 118,274,000 | 301,000     | loss            | Familial                  |
| NAARCP2-D11-H10615      |           | 1023      | 8     | 3 3p13.31          | 117,973,000 | 118,274,000 | 301,000     | loss            | Familial                  |
| NAAR045-E11-01C07334    |           | 7019      | 5     | 3 3q25.33;3q26.1   | 160,960,000 | 162,570,000 | 1,610,000   | gain            | Familial                  |
| NAAR045-E8-01C07331     |           | 7019      | 8     | 3 3q25.33;3q26.1   | 160,960,000 | 162,570,000 | 1,610,000   | gain            | Familial                  |
| NAARCP1-F7-R-191-004    |           | 6026      | 4     | 3 3q28.3q29        | 193,786,000 | 195,272,000 | 1,486,000   | loss            | Mendelian Error           |
| NAAR052-F6-H10682       |           | 1092      | 4     | 4 4p16.3;4p16.2;4j | 398,352     | 22,577,600  | 22,179,248  | loss            | Mendelian Error           |
| NAAR062-H3-H11083       |           | 1218      | 3     | 4 4p16.3;4p16.2;4j | 398,352     | 6,790,000   | 6,391,648   | loss            | Mendelian Error           |
| NAAR045-D8-01C07315     |           | 7002;8038 | 4,203 | 4 4q13.3           | 73,981,000  | 75,223,100  | 1,242,100   | gain            | Familial                  |
| NAAR045-D6-01C07313     |           | 7002;8038 | 3,201 | 4 4q13.3           | 74,920,500  | 75,223,100  | 302,600     | gain            | Familial                  |
| NAAR010-F6-8268-111     |           | 8268      | 111   | 4 4q26             | 116,325,000 | 118,226,000 | 1,901,000   | gain            | Familial                  |
| NAAR010-F7-8268-201     |           | 8268      | 201   | 4 4q26             | 117,347,000 | 118,226,000 | 879,000     | gain            | Familial                  |
| NAAR010-F9-8268-203     |           | 8268      | 203   | 4 4q26             | 117,865,000 | 118,226,000 | 361,000     | gain            | Familial                  |
| NAAR014-C10-19981812    |           | 2016      | 16    | 4 4q32.2;4q32.3;4j | 162,505,000 | 173,191,000 | 10,686,000  | gain            | Familial                  |
| NAAR014-C9-19981150     |           | 2016      | 10    | 4 4q32.3;4q33;4q3j | 166,717,000 | 179,076,000 | 12,359,000  | gain            | Familial                  |
| NAAR047-C1-01C08451     |           | 7098      | 6     | 4 4q34.3           | 179,062,000 | 179,488,000 | 426,000     | gain            | Familial                  |
| NAAR047-C2-01C08452     |           | 7098      | 4     | 4 4q34.3           | 179,062,000 | 179,488,000 | 426,000     | gain            | Familial                  |
| NAAR047-F7-01C08499     |           | 7126      | 1     | 4 4q35.1;4q35.2    | 185,809,000 | 189,310,000 | 3,501,000   | gain            | Familial                  |
| NAAR047-F8-01C08500     |           | 7126      | 4     | 4 4q35.1;4q35.2    | 185,809,000 | 189,310,000 | 3,501,000   | gain            | Familial                  |
| NAAR047-F9-01C08501     |           | 7126      | 1     | 4 4q35.1;4q35.2    | 185,809,000 | 189,310,000 | 3,501,000   | gain            | Familial                  |
| NAAR012-E10-19-983957_2 |           | 4022      | 501   | 4 4q35.2           | 187,766,000 | 190,013,000 | 2,247,000   | gain            | Familial                  |
| NAAR062-D5-H10889       |           | 1088      | 3     | 4 4q35.2           | 188,796,000 | 189,905,000 | 1,109,000   | gain            | Familial                  |
| NAAR062-D6-H10890       |           | 1088      | 4     | 4 4q35.2           | 188,901,000 | 189,905,000 | 1,004,000   | gain            | Familial                  |
| NAAR070-H5-H13148       |           | 1420      | 302   | 4 4q35.2           | 189,303,000 | 189,310,000 | 7,000       | loss            | Familial                  |
| NAAR071-A5-H13159       |           | 1420      | 201   | 4 4q35.2           | 189,303,000 | 189,310,000 | 7,000       | loss            | Familial                  |
| NAAR071-A7-H13161       |           | 1420      | 303   | 4 4q35.2           | 189,303,000 | 189,310,000 | 7,000       | loss            | Familial                  |
| NAAR023-D9-3046.001     |           | 3046      | 1     | 4 4q35.2           | 189,670,000 | 190,118,000 | 448,000     | loss            | Familial                  |
| NAAR023-F9-3046.003     |           | 3046      | 3     | 4 4q35.2           | 189,670,000 | 190,118,000 | 448,000     | loss            | Familial                  |
| NAAR062-D4-H10888       |           | 1088      | 2     | 4 4q35.2           | 189,670,000 | 189,905,000 | 235,000     | gain            | Familial                  |
| NAAR024-A12-3072.008    |           | 3072      | 8     | 4 4q35.2           | 189,808,000 | 191,091,000 | 1,283,000   | loss            | Familial                  |
| NAAR024-B12-3072.009    |           | 3072      | 9     | 4 4q35.2           | 189,808,000 | 191,091,000 | 1,283,000   | loss            | Familial                  |
| NAAR024-G11-3072.006    |           | 3072      | 6     | 4 4q35.2           | 189,808,000 | 191,091,000 | 1,283,000   | loss            | Familial                  |
| NAAR041-G10-01C05471    |           | 7008      | 2     | 4 4q35.2           | 190,013,000 | 191,091,000 | 1,078,000   | loss            | Familial                  |
| NAAR041-G7-01C05468     |           | 7008      | 4     | 4 4q35.2           | 190,013,000 | 191,091,000 | 1,078,000   | loss            | Familial, Mendelian Error |
| NAAR003-A5-8047-202     |           | 8047      | 202   | 5 5p15.33;5p15.32  | 1,677,350   | 8,438,300   | 6,760,950   | loss            | Mendelian Error           |
| NAAR030-E12-3198.003    |           | 3198      | 3     | 5 5p14.1           | 29,073,500  | 29,136,100  | 62,600      | loss            | Familial                  |
| NAAR030-F12-3198.004    |           | 3198      | 4     | 5 5p14.1           | 29,073,500  | 29,136,100  | 62,600      | loss            | Familial                  |
| NAAR050-H5-H12533       |           | 1356      | 302   | 5 5p14.1           | 29,073,500  | 29,136,100  | 62,600      | loss            | Familial, Mendelian Error |
| NAAR069-C1-H12941       |           | 1356      | 201   | 5 5p14.1           | 29,073,500  | 29,136,100  | 62,600      | loss            | Familial                  |
| NAAR062-A11-H10781      |           | 1172      | 4     | 5 5q12.2;5q11.2;5j | 57,466,600  | 179,796,000 | 122,329,400 | gain            | Mendelian Error           |
| NAAR067-E6-H12773       |           | 1394      | 202   | 5 5q12.1           | 62,312,800  | 62,902,800  | 590,000     | loss            | Familial                  |
| NAAR067-E8-H12775       |           | 1394      | 301   | 5 5q12.1           | 62,312,800  | 62,902,800  | 590,000     | loss            | Familial                  |
| NAAR054-B1-H10145       |           | 2021;1099 | 4,4   | 5 5q13.3           | 75,136,400  | 75,136,700  | 300         | loss            | Mendelian Error           |
| NAAR047-E4-01C08484     |           | 7113      | 4     | 5 5q23.1           | 117,056,000 | 119,691,000 | 2,635,000   | loss            | Mendelian Error           |
| NAAR029-A9-3171.003     |           | 3171      | 3     | 5 5q23.2           | 125,468,000 | 125,556,000 | 88,000      | gain            | Familial                  |
| NAAR029-D9-3171.006     |           | 3171      | 6     | 5 5q23.2           | 125,468,000 | 125,556,000 | 88,000      | gain            | Familial                  |
| NAAR080-D1-H11260       |           | 1211      | 5     | 5 5q23.2;5q31.1;5j | 127,335,000 | 179,796,000 | 52,461,000  | gain            | Mendelian Error           |
| NAAR001-H4-8021-101     |           | 8021      | 101   | 6 6p25.3           | 150,610     | 374,457     | 223,847     | gain            | Familial                  |
| NAAR001-H5-8021-111     |           | 8021      | 111   | 6 6p25.3           | 150,610     | 374,457     | 223,847     | gain            | Familial                  |
| NAAR027-A9-3124.001     |           | 3124      | 1     | 6 6p25.3           | 150,610     | 374,457     | 223,847     | gain            | Familial                  |
| NAAR027-B9-3124.002     |           | 3124      | 12    | 6 6p25.3           | 150,610     | 374,457     | 223,847     | gain            | Familial                  |
| NAAR027-C9-3124.003     |           | 3124      | 3     | 6 6p25.3           | 150,610     | 374,457     | 223,847     | gain            | Familial                  |
| NAAR052-F3-H10633       |           | 1041      | 3     | 6 6p25.3;6p25.2;6j | 150,610     | 30,443,000  | 30,292,390  | loss            | Mendelian Error           |
| NAAR014-H6-20-0425549   |           | 4060      | 1     | 6 6p22.3;6p22.2;6j | 18,944,300  | 27,642,200  | 8,697,900   | gain            | Mendelian Error           |
| NAAR011-D3-8299-202_2   |           | 8299      | 202   | 6 6p12.1;6p11.2;6j | 54,139,800  | 65,881,300  | 11,741,500  | gain            | Familial                  |
| NAAR078-A3-200305415    |           | 4075      | 100   | 6 6q22.2;6q22.1;6j | 112,813,000 | 154,205,000 | 41,392,000  | loss            | Mendelian Error           |
| NAAR066-E8-H12732       |           | 1402</    |       |                    |             |             |             |                 |                           |



| SCAN ID                 | Family ID | Invd ID   | chr   | cytoband            | start      | stop        | size       | cnv (loss/gain) | Validation                |
|-------------------------|-----------|-----------|-------|---------------------|------------|-------------|------------|-----------------|---------------------------|
| NAAR010-B5-8254-204     |           | 8252      | 101   | 13 13q21.2          | 59,820,300 | 60,629,400  | 809,100    | gain            | Familial                  |
| NAAR031-A8-3212.005     |           | 3212      | 5     | 13 13q21.32         | 64,798,700 | 65,319,400  | 520,700    | gain            | Familial                  |
| NAAR031-G7-3212.003     |           | 3212      | 3     | 13 13q21.32         | 64,798,700 | 65,319,400  | 520,700    | gain            | Familial                  |
| NAAR025-E6-3085.003     |           | 3085      | 3     | 14 14q12            | 24,430,200 | 26,578,900  | 2,148,700  | gain            | Familial                  |
| NAAR025-F6-3085.004     |           | 3085      | 4     | 14 14q12            | 24,430,200 | 26,578,900  | 2,148,700  | gain            | Familial                  |
| NAAR025-G6-3085.005     |           | 3085      | 5     | 14 14q12            | 24,430,200 | 26,578,900  | 2,148,700  | gain            | Familial                  |
| NAAR025-H6-3085.006     |           | 3085      | 6     | 14 14q12            | 24,430,200 | 26,578,900  | 2,148,700  | gain            | Familial                  |
| NAAR074-H7-04C35946     |           | 5036      | 2     | 14 14q12            | 24,430,200 | 26,578,900  | 2,148,700  | gain            | Familial                  |
| NAAR075-E1-04C36221     |           | 5025      | 8     | 14 14q12            | 24,430,200 | 26,578,900  | 2,148,700  | gain            | Familial                  |
| NAAR076-A1-04C36336     |           | 5026      | 7     | 14 14q12            | 24,430,200 | 26,578,900  | 2,148,700  | gain            | Familial                  |
| NAAR076-F7-04C37159     |           | 5036      | 4     | 14 14q12            | 24,430,200 | 26,578,900  | 2,148,700  | gain            | Familial                  |
| NAAR013-H5-20-003619    |           | 4042      | 501   | 15 15q11.2;15q12.1  | 21,490,300 | 28,040,100  | 6,549,800  | gain            | Familial                  |
| NAAR024-A7-3064.002     |           | 3064      | 2     | 15 15q11.2;15q12    | 21,490,300 | 25,698,400  | 4,208,100  | gain            | Familial                  |
| NAAR024-B7-3064.003     |           | 3064      | 3     | 15 15q11.2;15q12    | 21,490,300 | 25,698,400  | 4,208,100  | gain            | Familial, Affy Nsp 250K   |
| NAAR024-C7-3064.004     |           | 3064      | 4     | 15 15q11.2;15q12    | 21,490,300 | 25,698,400  | 4,208,100  | gain            | Familial, Affy Nsp 250K   |
| NAAR039-E9-1012-F2-PA   |           | 4042      | 102   | 15 15q11.2;15q12.1  | 21,490,300 | 25,698,400  | 4,208,100  | gain            | Familial                  |
| NAAR065-E8-HI0302       |           | 1097      | 3     | 15 15q11.2;15q12    | 21,490,300 | 25,698,400  | 4,208,100  | gain            | Familial                  |
| NAAR065-E7-HI0304       |           | 1097      | 4     | 15 15q11.2;15q12    | 21,490,300 | 25,698,400  | 4,208,100  | gain            | Familial                  |
| NAAR078-A3-200305415    |           | 4075      | 100   | 15 15q22.1;15q22.3  | 49,345,700 | 100,170,000 | 50,824,300 | gain            | Mendelian Error           |
| NAAR046-G1-01C08070     |           | 7073      | 5     | 15 15q26.3          | 99,686,700 | 100,170,000 | 483,300    | gain            | Familial                  |
| NAAR046-G2-01C08071     |           | 7073      | 3     | 15 15q26.3          | 99,686,700 | 100,170,000 | 483,300    | gain            | Familial                  |
| NAAR064-C5-HI1705       |           | 1303      | 4     | 16 16p12.3          | 17,241,900 | 18,006,800  | 764,900    | loss            | Familial                  |
| NAAR064-C7-HI1861       |           | 1303      | 3     | 16 16p12.3          | 17,241,900 | 18,006,800  | 764,900    | loss            | Familial                  |
| NAAR026-B4-3099.006     |           | 3099      | 6     | 16 16q21            | 60,141,700 | 61,581,600  | 1,439,900  | loss            | Familial                  |
| NAAR026-C4-3099.007     |           | 3099      | 7     | 16 16q21            | 60,141,700 | 61,581,600  | 1,439,900  | loss            | Familial                  |
| NAAR026-D4-3099.008     |           | 3099      | 8     | 16 16q21            | 60,141,700 | 61,581,600  | 1,439,900  | loss            | Familial                  |
| NAAR045-C7-01C07274     |           | 9019      | 3     | 16 16q22.3          | 73,431,000 | 73,547,600  | 116,600    | loss            | Mendelian Error           |
| NAAR002-A4-8025-111     |           | 8025      | 111   | 16 16q23.1          | 74,542,400 | 74,727,000  | 184,600    | gain            | Familial                  |
| NAAR002-A8-8025-204     |           | 8025      | 204   | 16 16q23.1          | 74,542,400 | 74,727,000  | 184,600    | gain            | Familial                  |
| NAAR017-D3-HI2242       |           | 1294      | 5     | 16 16q23.3          | 81,327,500 | 82,362,300  | 1,034,800  | gain            | Familial                  |
| NAAR017-D4-HI2243       |           | 1294      | 6     | 16 16q23.3          | 81,327,500 | 82,362,300  | 1,034,800  | gain            | Familial                  |
| NAAR001-D12-8012-111    |           | 8012      | 111   | 17 17p12            | 14,304,400 | 15,237,700  | 933,300    | loss            | Familial                  |
| NAAR019-F3-HI0561       |           | 3135;1058 | 2;1   | 17 17p12            | 14,304,400 | 15,237,700  | 933,300    | loss            | Familial                  |
| NAAR028-B4-3135-002     |           | 1058;3135 | 1;2   | 17 17p12            | 14,304,400 | 15,237,700  | 933,300    | loss            | Familial                  |
| NAAR028-C4-3135-003     |           | 1058;3135 | 4;3   | 17 17p12            | 14,304,400 | 15,237,700  | 933,300    | loss            | Familial                  |
| NAAR028-D4-3135-004     |           | 1058;3135 | 5;4   | 17 17p12            | 14,304,400 | 15,237,700  | 933,300    | loss            | Familial                  |
| NAAR068-B10-HI1406      |           | 1263      | 3     | 17 17p12            | 14,304,400 | 15,618,600  | 1,314,200  | gain            | Familial                  |
| NAAR068-B11-HI1405      |           | 1263      | 4     | 17 17p12            | 14,304,400 | 15,618,600  | 1,314,200  | gain            | Familial                  |
| NAAR068-B12-HI1404      |           | 1263      | 5     | 17 17p12            | 14,304,400 | 15,618,600  | 1,314,200  | gain            | Familial                  |
| NAAR001-E1-8012-201     |           | 8012      | 201   | 17 17p12            | 14,432,900 | 15,237,700  | 804,800    | loss            | Mendelian Error           |
| NAAR068-B9-HI1408       |           | 1263      | 2     | 17 17p12            | 14,432,900 | 15,618,600  | 1,185,700  | gain            | Familial                  |
| NAAR003-A5-8047-202     |           | 8047      | 202   | 17 17q21.1;17q25.2  | 33,248,900 | 76,399,500  | 43,150,600 | gain            | Mendelian Error           |
| NAAR032-H10-3251.004    |           | 1238;3251 | 4;4   | 17 17q21.31;17q21.2 | 39,115,900 | 47,542,500  | 8,426,600  | gain            | Familial                  |
| NAAR028-F12-3152.002    |           | 3152      | 2     | 17 17q21.33;17q22   | 47,396,100 | 47,542,500  | 146,400    | gain            | Familial                  |
| NAAR029-B1-3152.004     |           | 3152      | 4     | 17 17q21.33;17q22   | 47,396,100 | 47,542,500  | 146,400    | gain            | Familial                  |
| NAAR053-A1-HI1319       |           | 3251;1238 | 4;4   | 17 17q21.33;17q22   | 47,396,100 | 47,542,500  | 146,400    | gain            | Familial                  |
| NAAR060-F1-HI1320       |           | 1238;3251 | 6;2   | 17 17q21.33;17q22   | 47,396,100 | 47,542,500  | 146,400    | gain            | Familial, Mendelian Error |
| NAAR067-D10-HI2765      |           | 1384      | 202   | 18 18p11.32         | 1,564,270  | 1,807,190   | 242,920    | gain            | Familial                  |
| NAAR067-D12-HI2767      |           | 1384      | 301   | 18 18p11.32         | 1,564,270  | 1,964,310   | 400,040    | gain            | Familial                  |
| NAAR025-B4-3081.003     |           | 3081      | 3     | 18 18p11.22         | 8,513,940  | 8,514,030   | 1,000      | loss            | Familial                  |
| NAAR025-D4-3081.005     |           | 3081      | 5     | 18 18p11.22         | 8,513,940  | 8,514,030   | 1,000      | loss            | Familial                  |
| NAAR022-A10-3023.003    |           | 3023      | 4     | 18 18p11.22;18p11.1 | 10,741,600 | 12,085,900  | 1,344,300  | gain            | Familial                  |
| NAAR022-G9-3023.002     |           | 3023      | 2     | 18 18p11.22;18p11.1 | 10,741,600 | 11,601,400  | 859,200    | gain            | Familial                  |
| NAAR030-E12-3198.004    |           | 3198      | 3     | 19 19q13.13;19p13   | 3,542,590  | 57,869,600  | 54,327,010 | gain            | Familial                  |
| NAAR030-F12-3198.004    |           | 3198      | 4     | 19 19q13.13;19p13   | 3,542,590  | 63,437,700  | 59,895,110 | gain            | Familial                  |
| NAAR032-E1-3222.002     |           | 3222      | 2     | 19 19q13.13;19p13   | 3,542,590  | 63,437,700  | 59,895,110 | gain            | Familial                  |
| NAAR032-F1-3222.003     |           | 3222      | 3     | 19 19q13.13;19p13   | 3,542,590  | 63,437,700  | 59,895,110 | gain            | Familial                  |
| NAAR032-G1-3222.004     |           | 3222      | 4     | 19 19q13.13;19p13   | 3,542,590  | 63,437,700  | 59,895,110 | gain            | Familial                  |
| NAAR037-C2-1014-C2-P3   |           | 3221      | 4     | 19 19p13.3;19p13.2  | 3,542,590  | 15,912,900  | 12,370,310 | gain            | Familial                  |
| NAAR037-C3-1014-C3-P3   |           | 3221      | 5     | 19 19p13.3;19p13.2  | 3,542,590  | 15,912,900  | 12,370,310 | gain            | Familial                  |
| NAAR035-D10-1014-D10-P1 |           | 3024      | 2     | 19 19p13.12         | 14,604,000 | 15,450,300  | 846,300    | gain            | Familial                  |
| NAAR035-D9-1014-D9-P1   |           | 3024      | 1     | 19 19p13.12         | 14,604,000 | 14,801,000  | 197,000    | gain            | Familial                  |
| NAAR036-A10-1014-A10-P2 |           | 3094      | 3     | 19 19q13.12;19q13   | 42,492,500 | 63,437,700  | 20,945,200 | gain            | Mendelian Error           |
| NAAR037-B4-1014-B4-P3   |           | 3201      | 3     | 19 19q13.12;19q13   | 42,492,500 | 59,489,700  | 16,997,200 | gain            | Mendelian Error           |
| NAAR038-F12-1015-F12-P1 |           | 5093      | 3     | 19 19q13.32;19q13   | 50,478,900 | 56,589,300  | 6,114,400  | gain            | Mendelian Error           |
| NAAR037-C2-1014-C2-P3   |           | 3221      | 4     | 19 19q13.11;19q13   | 56,275,700 | 63,437,700  | 7,162,000  | gain            | Familial                  |
| NAAR037-C1-1014-C1-P3   |           | 3221      | 2     | 19 19q13.11;19q13   | 56,275,700 | 63,437,700  | 6,674,400  | gain            | Familial                  |
| NAAR041-G10-01C05471    |           | 7008      | 2     | 20 20p13            | 95,685     | 1,358,480   | 1,262,795  | gain            | Familial                  |
| NAAR041-G7-01C05468     |           | 7008      | 4     | 20 20p13            | 95,685     | 691,220     | 595,535    | gain            | Familial                  |
| NAAR025-E6-3085.003     |           | 3085      | 3     | 20 20q13.33         | 59,180,200 | 61,366,400  | 2,186,200  | gain            | Familial                  |
| NAAR025-H7-3085.014     |           | 3085      | 14    | 20 20q13.33         | 59,180,200 | 61,366,400  | 2,186,200  | gain            | Familial                  |
| NAAR030-E7-3183.001     |           | 3183      | 1     | 20 20q13.33         | 59,180,200 | 61,366,400  | 2,186,200  | gain            | Familial                  |
| NAAR030-F7-3183.002     |           | 3183      | 2     | 20 20q13.33         | 59,180,200 | 61,366,400  | 2,186,200  | gain            | Familial                  |
| NAAR059-C10-HI1879      |           | 4031;1174 | 500;2 | 21 21q22.12         | 36,447,400 | 36,479,700  | 32,300     | gain            | Familial                  |
| NAAR059-C7-HI1876       |           | 4031;1174 | 100;4 | 21 21q22.12         | 36,447,400 | 36,479,700  | 32,300     | gain            | Familial                  |
| NAAR030-E12-3198.003    |           | 3198      | 3     | 21 21q22.3          | 42,530,300 | 46,782,200  | 4,251,900  | gain            | Familial                  |
| NAAR030-F12-3198.004    |           | 3198      | 4     | 21 21q22.3          | 42,530,300 | 46,782,200  | 4,251,900  | gain            | Familial                  |
| NAAR032-D2-3224.002     |           | 3224      | 2     | 21 21q22.3          | 42,530,300 | 46,782,200  | 4,251,900  | gain            | Familial                  |
| NAAR032-D6-3238.003     |           | 3238      | 3     | 21 21q22.3          | 42,530,300 | 46,782,200  | 4,251,900  | gain            | Familial                  |
| NAAR032-E1-3222.002     |           | 3222      | 2     | 21 21q22.3          | 42,530,300 | 46,782,200  | 4,251,900  | gain            | Familial                  |
| NAAR032-F1-3222.003     |           | 3222      | 3     | 21 21q22.3          | 42,530,300 | 46,782,200  | 4,251,900  | gain            | Familial                  |
| NAAR032-G1-3222.004     |           | 3222      | 4     | 21 21q22.3          | 42,530,300 | 46,782,200  | 4,251,900  | gain            | Familial                  |
| NAAR032-G2-3224.005     |           | 3224      | 5     | 21 21q22.3          | 42,530,300 | 46,782,200  | 4,251,900  | gain            | Familial                  |
| NAAR019-C8-HI0322       |           | 1020      | 3     | 22 22q11.1;22q11.1  | 15,885,600 | 19,774,000  | 4,088,400  | gain            | FISH                      |
| NAAR063-B1-HI183.2      |           | 1004      | 4     | 22 22q11.21         | 17,506,900 | 19,774,000  | 2,267,100  | gain            | FISH                      |
| NAAR037-C2-1014-C2-P3   |           | 3221      | 4     | 22 22q12.1;22q12.2  | 25,705,900 | 32,390,900  | 6,685,000  | gain            | Mendelian Error           |
| NAAR029-C10-3172.007    |           | 3172      | 7     | 22 22q13.33         | 48,881,000 | 48,881,300  | 1,000      | gain            | Familial                  |
| NAAR029-F9-3172.002     |           | 3172      | 2     | 22 22q13.33         | 48,881,000 | 48,881,300  | 1,000      | gain            | Familial                  |
| NAAR053-F1-03C15328     |           | 2072      | 2     | 22 22q13.33         | 48,004,600 | 48,881,300  | 876,700    | loss            | Familial, Affy Nsp 250K   |
| NAAR072-F11-200501053   |           | 2072      | 1     | 22 22q13.33         | 48,004,600 | 48,881,300  | 876,700    | loss            | Familial, Affy Nsp 250K   |

List of Validated CNVs in Plate Analysis

| SCAN ID                 | Family ID | Invd ID   | chr     | cytoband         | start       | stop        | size       | cnv (loss/gain) | Validation                |
|-------------------------|-----------|-----------|---------|------------------|-------------|-------------|------------|-----------------|---------------------------|
| NAAR009-H10-8250-111    |           | 1359;8250 | 201;11  | 1 1p36.22;1p36.2 | 10,931,500  | 15,413,600  | 4,482,100  | gain            | Familial, Mendelian Error |
| NAAR051-F7-HI2612       |           | 8250;359  | 111;201 | 1 1p36.22;1p36.2 | 10,931,500  | 15,413,600  | 4,482,100  | gain            | Familial                  |
| NAAR037-C2-1014-C2-P3   |           | 3221      | 4       | 1 1p36.12;1p36.1 | 23,012,200  | 34,002,000  | 10,989,800 | gain            | Mendelian Error           |
| NAAR047-C10-01C08464    |           | 1116;7101 | 4;7     | 1 1p35.2         | 30,265,700  | 30,817,000  | 551,300    | loss            | Familial, Mendelian Error |
| NAAR047-C8-01C08462     |           | 1116;7101 | 1;1     | 1 1p35.2         | 30,265,700  | 30,817,000  | 551,300    | loss            | Familial                  |
| NAAR060-G3-HI2323       |           | 7101;1116 | 1;1     | 1 1p35.2         | 30,265,700  | 30,896,500  | 630,800    | loss            | Familial                  |
| NAAR074-A7-04C35667     |           | 5116      | 5       | 1 1p31.3         | 60,389,500  | 61,350,000  | 960,500    | gain            | Familial                  |
| NAAR074-C3-04C35691     |           | 5116      | 1       | 1 1p31.3         | 60,629,100  | 61,350,000  | 720,900    | gain            | Familial                  |
| NAAR074-D1-04C35701     |           | 5116      | 4       | 1 1p31.3         | 60,629,100  | 61,350,000  | 720,900    | gain            | Familial, Affy Nsp 250K   |
| NAAR036-D12-1014-D12-P2 |           | 3178      | 6       | 1 1p31.1         | 82,453,300  | 82,511,000  | 57,700     | gain            | Mendelian Error           |
| NAAR007-D4-8172-111     |           | 8172      | 111     | 1 1q21.1         | 143,780,000 | 144,894,000 | 1,114,000  |                 |                           |

| SCAN ID               | Family ID | Invd ID   | chr   | cytband             | start       | stop        | size        | cnv (loss/gain) | Validation                |
|-----------------------|-----------|-----------|-------|---------------------|-------------|-------------|-------------|-----------------|---------------------------|
| NAAR032-E1-3222.002   |           | 3222      | 2     | 2 2p24.1            | 21,249,500  | 21,510,300  | 260,800     | gain            | Familial                  |
| NAAR032-G1-3222.004   |           | 3222      | 4     | 2 2p24.1            | 21,249,500  | 22,833,700  | 1,584,200   | gain            | Familial                  |
| NAAR049-C8-02C10130   |           |           | 2     | 2 2p16.3            | 50,430,300  | 50,785,300  | 355,000     | loss            | QPCR, min.sat             |
| NAAR049-C11-02C10134  |           |           | 2     | 2 2p16.3            | 50,430,300  | 50,785,300  | 355,300     | loss            | QPCR, min.sat             |
| NAAR064-C2-H11745     | 8122;1295 |           | 203,3 | 2 2q12.3            | 106,922,000 | 107,678,000 | 756,000     | loss            | Mendelian Error           |
| NAAR022-E8-3020.004   |           | 3020      | 4     | 2 2q13              | 111,333,000 | 112,712,000 | 1,379,000   | gain            | Familial                  |
| NAAR035-D5-1014-D5-P1 |           | 3020      | 1     | 2 2q13              | 111,333,000 | 112,712,000 | 1,379,000   | gain            | Familial                  |
| NAAR006-A3-8125-201   |           | 8125      | 201   | 2 2q32.1            | 184,270,000 | 186,428,000 | 2,158,000   | gain            | Familial                  |
| NAAR006-A4-8125-202   |           | 8125      | 202   | 2 2q32.1            | 184,270,000 | 186,428,000 | 2,158,000   | gain            | Familial                  |
| NAAR062-A10-H10780    |           | 1172      | 2     | 2 2q34q2q35         | 211,888,000 | 217,650,000 | 5,771,000   | gain            | Familial                  |
| NAAR062-A12-H10782    |           | 1172      | 1     | 2 2q34q2q35         | 211,888,000 | 220,598,000 | 8,710,000   | gain            | Familial                  |
| NAAR007-B2-8159-101   |           | 8159      | 101   | 3 3p14.1            | 67,773,300  | 68,967,900  | 1,194,600   | loss            | Familial                  |
| NAAR007-B4-AU32503    |           | 8159      | 201   | 3 3p14.1            | 67,773,300  | 68,967,900  | 1,194,600   | loss            | Familial, Mendelian Error |
| NAAR007-B6-8159-203   |           | 8159      | 203   | 3 3p14.1            | 67,773,300  | 68,967,900  | 1,194,600   | loss            | Familial, Mendelian Error |
| NAAR030-F9-3192.001   |           | 3192      | 1     | 3 3p12.2            | 82,496,200  | 83,190,200  | 694,000     | gain            | Familial                  |
| NAAR037-A9-1014-A9-P3 |           | 3192      | 1     | 3 3p12.2            | 82,496,200  | 83,190,200  | 694,000     | gain            | Familial, Mendelian Error |
| NAAR025-D4-3081.005   |           | 3081      | 5     | 3 3p12.1            | 85,618,700  | 85,619,200  | 1,000       | loss            | Mendelian Error           |
| NAAR072-G5-H10615     |           | 1023      | 8     | 3 3q13.31           | 117,973,000 | 118,274,000 | 301,000     | loss            | Familial                  |
| NAARCP2-D11-H10615    |           | 1023      | 8     | 3 3q13.31           | 117,973,000 | 118,274,000 | 301,000     | loss            | Familial                  |
| NAAR052-F6-H10682     |           | 1092      | 4     | 4 4p16.31q4p16.21q  | 398,952     | 17,044,800  | 16,645,848  | loss            | Mendelian Error           |
| NAAR062-H3-H11083     |           | 1218      | 3     | 4 4p16.31q4p16.21q  | 398,952     | 6,790,030   | 6,391,078   | gain            | Mendelian Error           |
| NAAR052-F6-H10682     |           | 1092      | 4     | 4 4p15.32q15p15.3   | 18,198,800  | 23,734,300  | 5,545,500   | loss            | Mendelian Error           |
| NAAR045-G12-POS       | 3259;3078 |           | 1,2   | 4 4p15.21q4p15.1    | 27,420,500  | 28,639,200  | 1,218,700   | gain            | Familial                  |
| NAAR054-G12-POS       | 3078;3259 |           | 2,1   | 4 4p15.1            | 28,022,000  | 31,238,500  | 3,216,500   | gain            | Familial                  |
| NAAR055-G12-POS       | 3078;3259 |           | 2,1   | 4 4p15.1            | 28,022,000  | 31,238,500  | 3,216,500   | gain            | Familial                  |
| NAAR060-G12-POS       | 3078;3259 |           | 2,1   | 4 4p15.1            | 28,415,900  | 28,639,200  | 223,300     | loss            | Familial                  |
| NAAR033-E1-3257.002   |           | 3257      | 2     | 4 4q13.3            | 71,219,300  | 71,371,300  | 152,000     | loss            | Familial                  |
| NAAR033-E1-3257.005   |           | 3257      | 5     | 4 4q13.3            | 71,219,300  | 71,371,300  | 152,000     | loss            | Familial, Mendelian Error |
| NAAR010-F6-8268-111   |           | 8268      | 111   | 4 4q26              | 116,524,000 | 118,226,000 | 1,702,000   | gain            | Familial                  |
| NAAR010-F7-8268-201   |           | 8268      | 201   | 4 4q26              | 117,347,000 | 118,226,000 | 879,000     | gain            | Familial                  |
| NAAR047-F7-01C08499   |           | 7126      | 1     | 4 4q35.11q4q35.2    | 185,809,000 | 189,310,000 | 3,501,000   | gain            | Familial                  |
| NAAR047-F8-01C08500   |           | 7126      | 4     | 4 4q35.11q4q35.2    | 185,809,000 | 189,310,000 | 3,501,000   | gain            | Familial                  |
| NAAR047-F9-01C08501   |           | 7126      | 3     | 4 4q35.11q4q35.2    | 185,809,000 | 189,310,000 | 3,501,000   | gain            | Familial                  |
| NAAR062-D6-H10889     |           | 1088      | 3     | 4 4q35.2            | 188,901,000 | 189,905,000 | 1,108,000   | gain            | Familial                  |
| NAAR062-D6-H10889     |           | 1088      | 4     | 4 4q35.2            | 188,901,000 | 189,905,000 | 1,004,000   | gain            | Familial                  |
| NAAR062-D7-H10891     |           | 1088      | 5     | 4 4q35.2            | 188,901,000 | 189,310,000 | 409,000     | loss            | Familial                  |
| NAAR027-C6-3120.003   |           | 3120      | 3     | 4 4q35.2            | 189,303,000 | 189,310,000 | 7,000       | loss            | Familial                  |
| NAAR027-D6-3120.004   |           | 3120      | 4     | 4 4q35.2            | 189,303,000 | 189,310,000 | 7,000       | loss            | Familial                  |
| NAAR027-E6-3120.005   |           | 3120      | 5     | 4 4q35.2            | 189,303,000 | 189,310,000 | 7,000       | loss            | Familial                  |
| NAAR070-H5-H13148     |           | 1420      | 302   | 4 4q35.2            | 189,303,000 | 189,310,000 | 7,000       | loss            | Familial                  |
| NAAR071-A5-H13159     |           | 1420      | 201   | 4 4q35.2            | 189,303,000 | 189,310,000 | 7,000       | loss            | Familial                  |
| NAAR071-A7-H13161     |           | 1420      | 303   | 4 4q35.2            | 189,303,000 | 189,310,000 | 7,000       | loss            | Familial                  |
| NAAR023-D9-3046.001   |           | 3046      | 1     | 4 4q35.2            | 189,670,000 | 190,118,000 | 448,000     | loss            | Familial                  |
| NAAR023-F9-3046.003   |           | 3046      | 3     | 4 4q35.2            | 189,670,000 | 190,118,000 | 448,000     | loss            | Familial, Mendelian Error |
| NAAR062-D4-H10888     |           | 1088      | 2     | 4 4q35.2            | 189,670,000 | 189,905,000 | 235,000     | gain            | Familial                  |
| NAAR073-E12-04C35554  |           | 5035      | 2     | 4 4q35.2            | 189,670,000 | 190,118,000 | 448,000     | gain            | Familial, Affy Nsp 250K   |
| NAAR073-F2-04C35556   |           | 5035      | 3     | 4 4q35.2            | 189,670,000 | 190,200,000 | 530,000     | gain            | Familial                  |
| NAAR073-H10-04C35587  |           | 5035      | 2     | 4 4q35.2            | 189,670,000 | 190,118,000 | 448,000     | gain            | Familial                  |
| NAAR024-A12-3072.008  |           | 3072      | 8     | 4 4q35.2            | 189,808,000 | 191,091,000 | 1,283,000   | loss            | Familial, Mendelian Error |
| NAAR024-B12-3072.009  |           | 3072      | 9     | 4 4q35.2            | 189,808,000 | 191,091,000 | 1,283,000   | loss            | Familial, Mendelian Error |
| NAAR024-G11-3072.006  |           | 3072      | 6     | 4 4q35.2            | 189,808,000 | 191,091,000 | 1,283,000   | loss            | Familial                  |
| NAAR041-G10-01C05471  |           | 7008      | 2     | 4 4q35.2            | 190,013,000 | 191,091,000 | 1,078,000   | loss            | Familial                  |
| NAAR041-G11-01C05468  |           | 7008      | 4     | 4 4q35.2            | 190,013,000 | 191,091,000 | 1,078,000   | loss            | Familial, Mendelian Error |
| NAAR003-A5-8047-202   |           | 8047      | 202   | 5 5p15.331q5p15.3   | 1,677,350   | 8,438,300   | 6,760,950   | loss            | Mendelian Error           |
| NAAR030-D12-3198.002  |           | 3198      | 2     | 5 5p14.1            | 29,073,500  | 29,136,100  | 62,600      | loss            | Familial                  |
| NAAR030-E12-3198.003  |           | 3198      | 3     | 5 5p14.1            | 29,073,500  | 29,136,100  | 62,600      | loss            | Familial, Mendelian Error |
| NAAR030-F12-3198.004  |           | 3198      | 4     | 5 5p14.1            | 29,073,500  | 29,136,100  | 62,600      | loss            | Familial, Mendelian Error |
| NAAR031-A1-3198.005   |           | 3198      | 5     | 5 5p14.1            | 29,073,500  | 29,136,100  | 62,600      | loss            | Familial                  |
| NAAR050-H5-H12533     |           | 1356      | 302   | 5 5p14.1            | 29,073,500  | 29,136,100  | 62,600      | loss            | Familial, Mendelian Error |
| NAAR069-C1-H12941     |           | 1356      | 201   | 5 5p14.1            | 29,073,500  | 29,136,100  | 62,600      | loss            | Familial                  |
| NAAR062-A11-H10781    |           | 1172      | 4     | 5 5q12.21q5q12.31q  | 62,596,000  | 179,796,000 | 117,200,000 | gain            | Mendelian Error           |
| NAAR047-C10-01C08464  |           | 1116;7101 | 4,7   | 5 5q21.3            | 108,971,000 | 109,116,000 | 145,000     | gain            | Familial                  |
| NAAR047-C11-01C08465  |           | 7101;1116 | 10,5  | 5 5q21.3            | 108,971,000 | 109,116,000 | 145,000     | gain            | Familial                  |
| NAAR047-E4-01C08484   |           | 7113      | 4     | 5 5q23.1            | 117,078,000 | 119,691,000 | 2,613,000   | loss            | Mendelian Error           |
| NAAR073-A1-02C09714   |           | 2068;2068 | 3,4   | 6 6p25.3            | 150,610     | 1,478,110   | 1,327,500   | gain            | Familial                  |
| NAAR073-A3-02C09716   |           | 2068      | 2     | 6 6p25.3            | 150,610     | 1,478,110   | 1,327,500   | gain            | Familial                  |
| NAAR073-A4-02C09717   |           | 2068;2068 | 3,4   | 6 6p25.3            | 150,610     | 1,478,110   | 1,327,500   | gain            | Familial                  |
| NAAR052-F3-H10633     |           | 1041      | 3     | 6 6p25.31q6p25.21q  | 374,457     | 30,443,000  | 30,068,543  | loss            | Mendelian Error           |
| NAAR055-A4-H10442     |           | 1066      | 4     | 6 6p25.21q6p25.11q  | 3,801,430   | 18,594,500  | 14,793,070  | loss            | Mendelian Error           |
| NAAR078-A3-200305415  |           | 4075      | 100   | 6 6q21.31q6q22.11q  | 113,107,000 | 121,399,000 | 8,292,000   | loss            | Mendelian Error           |
| NAAR078-A3-200305415  |           | 4075      | 100   | 6 6q22.311q6q22.3.1 | 122,787,000 | 130,388,000 | 7,601,000   | loss            | Mendelian Error           |
| NAAR078-A3-200305415  |           | 4075      | 100   | 6 6q24.21q6q24.3.1  | 144,964,000 | 148,228,000 | 3,264,000   | loss            | Mendelian Error           |
| NAAR052-G9-H11097     |           | 1047      | 4     | 6 6q26              | 163,090,000 | 163,493,000 | 403,000     | gain            | Familial                  |
| NAAR017-C4-H12209     |           | 1047      | 102   | 6 6q26              | 163,493,000 | 163,493,000 | 1,000       | gain            | Familial                  |
| NAAR064-A8-H11697     |           | 1284      | 8     | 6 6q261q6q27        | 164,166,000 | 165,792,000 | 1,626,000   | loss            | Mendelian Error           |
| NAAR072-C7-H13275     |           | 1411      | 202   | 7 7q21.31q7p21.21q  | 11,819,700  | 16,715,900  | 4,896,200   | gain            | Familial                  |
| NAAR072-A5-H13244     |           | 1411      | 302   | 7 7q21.31q7p21.21q  | 12,246,800  | 17,334,000  | 5,087,200   | gain            | Familial                  |
| NAAR063-F2-H11522     |           | 1226      | 1     | 7 7q12.31q7p12.2    | 49,519,500  | 49,519,500  | 1,219,700   | gain            | Familial                  |
| NAAR063-F4-H11524     |           | 1226      | 6     | 7 7q12.31q7p12.2    | 49,519,500  | 50,046,900  | 527,400     | gain            | Familial                  |
| NAAR064-A2-H11684     |           | 1245      | 6     | 7 7q21.11           | 83,174,700  | 84,701,800  | 1,527,100   | loss            | Familial                  |
| NAAR064-A4-H11686     |           | 1245      | 9     | 7 7q21.11           | 83,174,700  | 85,227,400  | 2,052,700   | loss            | Familial, Mendelian Error |
| NAAR061-A6-H10130     |           | 1010      | 4     | 7 7q31.32           | 120,844,000 | 121,741,000 | 897,000     | loss            | Familial                  |
| NAAR061-A5-H10128     |           | 1010      | 5     | 7 7q31.32           | 121,543,000 | 122,291,000 | 748,000     | loss            | Familial, Mendelian Error |
| NAAR052-E3-H10085     | 1065;7103 | 1261      | 4,5   | 7 7q36.1            | 149,576,500 | 149,708,000 | 133,000     | loss            | Mendelian Error           |
| NAAR063-C5-H11372     |           | 1261      | 5     | 8 8p23.2            | 3,909,530   | 3,910,100   | 1,000       | gain            | Familial                  |
| NAAR067-A8-H12741     |           | 1261      | 8     | 8 8p23.2            | 3,909,530   | 3,909,710   | 1,000       | gain            | Familial                  |
| NAAR054-C1-H10191     | 7052;1017 |           | 3,3   | 8 8p23.2            | 4,473,850   | 4,949,310   | 475,460     | gain            | Familial                  |
| NAAR054-B12-H10189    | 1017;7052 |           | 2,1   | 8 8p23.2            | 4,881,960   | 4,949,310   | 67,350      | gain            | Familial                  |
| NAAR007-E6-8175-201   |           | 8175      | 201   | 8 8p23.1            | 8,160,870   | 11,422,100  | 3,261,230   | loss            | Mendelian Error           |
| NAAR041-F5-00C03537   |           | 2029      | 2     | 8 8p22              | 13,570,600  | 14,168,200  | 597,600     | gain            | Familial                  |
| NAAR041-G2-00C04611   |           | 2029      | 3     | 8 8p22              | 13,570,600  | 14,168,200  | 597,600     | gain            | Familial                  |
| NAAR050-H5-H12533     |           | 1356      | 302   | 9 9q24.3            | 239,391     | 559,992     | 320,601     | gain            | Familial                  |
| NAAR064-F6-H12067     |           | 1305      | 3     | 9 9q24.31q9p24.21q  | 239,391     | 33,916,500  | 33,677,109  | gain            | Familial                  |
| NAAR064-F8-H12081     |           | 1305      | 2     | 9 9q24.3            | 239,391     | 1,599,250   | 1,359,859   | gain            | Familial                  |
| NAAR069-C1-H12941     |           | 1356      | 201   | 9 9q24.3            | 239,391     | 559,992     | 320,601     | gain            | Familial                  |
| NAAR074-A9-04C35688   |           | 5134      | 2     | 9 9q24.3            | 239,391     | 1,599,250   | 1,359,859   | gain            | Familial                  |
| NAAR074-G7-04C35931   |           | 5134      | 4     | 9 9q24.3            | 239,391     | 1,599,250   | 1,359,859   | gain            | Familial                  |
| NAAR041-F10-00C04574  |           | 9032      | 4     | 9 9q23              | 11,611,200  | 12,277,900  | 666,700     | loss            | Familial, Mendelian Error |
| NAAR041-F12-00C04583  |           | 9032      | 2     | 9 9q23              | 11,611,200  | 12,277,900  | 666,700     | loss            | Familial                  |
| NAAR002-G12-8045-101  |           | 1008;8045 | 1,101 | 9 9q23              | 12,010,900  | 12,277,900  | 267,000     | loss            | Familial                  |
| NAAR052-H6-H11012     |           | 1183      | 3     | 9 9q23              | 12,010,900  | 12,277,900  | 267,000     | loss            | Mendelian Error           |
| NAAR071-H9-H11766     | 1008;8045 |           | 1,101 | 9 9q23              | 12,010,900  | 12,277,900  | 267,000     | loss            | Familial                  |
| NAAR017-E6-H12334     |           | 1302      | 3     | 9 9p13.31q9p13.21q  | 34,733,600  | 80,821,100  | 46,087,500  | gain            | Mendelian Error           |
| NAAR022-A8-3019.004   |           | 3019      | 4     | 9 9q21.121q9q21.1   | 70,619,600  | 70,908,800  | 289,200     | loss            | Familial, Mendelian Error |
| NAAR022-H7-3019.003   |           | 3019      | 3     | 9 9q21.121q9q21.1   | 70,619,600  | 70,908,800  |             |                 |                           |

| SCAN ID                 | Family ID                     | Invd ID | chr                | cytband            | start       | stop        | size       | cnv (loss/gain)           | Validation                |
|-------------------------|-------------------------------|---------|--------------------|--------------------|-------------|-------------|------------|---------------------------|---------------------------|
| NAAR035-C11-1014-C11-P1 |                               | 3011    | 8                  | 11 11p11.12        | 50,096,900  | 50,595,000  | 498,100    | gain                      | Familial                  |
| NAAR056-C2-H0789        |                               | 1203    | 4                  | 11 11p11.12        | 50,096,900  | 50,595,000  | 498,100    | gain                      | Familial                  |
| NAAR056-C4-H0801        |                               | 1203    | 2                  | 11 11p11.12        | 50,096,900  | 50,595,000  | 498,100    | gain                      | Familial                  |
| NAAR068-F2-HI2862       |                               | 1440    | 302                | 11 11p11.12        | 50,096,900  | 50,595,000  | 498,100    | gain                      | Familial                  |
| NAAR022-B3-3011.002     |                               | 3011    | 2                  | 11 11p11.12        | 50,123,600  | 50,595,000  | 471,400    | gain                      | Familial                  |
| NAAR074-C12-04C35700    |                               | 5081    | 4                  | 11 11p11.12        | 51,247,900  | 51,319,500  | 71,600     | gain                      | Affy Nsp 250K             |
| NAAR001-F11-8017-202    |                               | 8017    | 202                | 11 11q14.1         | 77,603,900  | 77,613,800  | 9,900      | loss                      | Mendelian Error           |
| NAAR026-G7-3105.004     |                               | 3105    | 4                  | 11 11q22.3         | 103,005,000 | 103,045,000 | 40,000     | loss                      | Mendelian Error           |
| NAAR020-DE-H11175       |                               | 1117    | 2                  | 11 11q22.3         | 103,928,000 | 104,733,000 | 805,000    | gain                      | Familial                  |
| NAAR063-B2-HI1189       |                               | 1117    | 3                  | 11 11q22.3         | 103,928,000 | 104,849,000 | 921,000    | gain                      | Familial                  |
| NAAR063-B3-HI1190       |                               | 1117    | 5                  | 11 11q22.3         | 103,928,000 | 104,733,000 | 805,000    | gain                      | Familial                  |
| NAAR043-D12-01C06058    | 2003.2003.7057.7057.1386.1386 | 1092    | 4,5;3;4;302;303    | 11 11q25           | 131,716,000 | 131,787,000 | 71,000     | gain                      | Familial                  |
| NAAR052-B12-02C13222    | 2003.2003.7057.7057.1386.1386 | 1092    | 4,5;3;4;302;303    | 11 11q25           | 131,716,000 | 131,787,000 | 71,000     | gain                      | Familial                  |
| NAAR066-D1-HI2798       | 7057.1386                     | 5301    | 11 11q25           | 131,716,000        | 131,751,000 | 35,000      | gain       | Familial                  |                           |
| NAAR047-E2-01C08492     |                               | 7113    | 1                  | 12 12p11.23        | 27,470,200  | 27,495,700  | 25,500     | gain                      | Familial                  |
| NAAR047-E5-01C08485     |                               | 7113    | 3                  | 12 12p11.23        | 27,470,200  | 27,495,700  | 25,500     | gain                      | Familial                  |
| NAAR033-A8-3271.005     |                               | 3271    | 5                  | 12 12q12           | 36,506,000  | 36,727,000  | 221,000    | loss                      | Familial                  |
| NAAR033-E7-3271.001     |                               | 3271    | 1                  | 12 12q12           | 36,506,000  | 36,727,000  | 221,000    | loss                      | Familial                  |
| NAAR052-F6-HI0682       |                               | 1092    | 4                  | 12 12q24.121112q13 | 44,378,800  | 130,547,000 | 86,168,200 | gain                      | Familial, Mendelian Error |
| NAAR033-F1-3258.001     |                               | 3258    | 1                  | 12 12q14.1         | 58,858,000  | 59,736,400  | 878,400    | loss                      | Familial                  |
| NAAR033-G1-3258.004     |                               | 3258    | 4                  | 12 12q14.1         | 58,858,000  | 59,736,400  | 878,400    | loss                      | Familial, Mendelian Error |
| NAAR055-G1-HI0683       |                               | 1092    | 1                  | 12 12q23.1112q23.1 | 97,294,200  | 100,120,000 | 2,915,800  | gain                      | Familial                  |
| NAAR041-F10-00C04574    |                               | 9032    | 4                  | 13 13q12.12        | 22,502,100  | 23,692,300  | 1,190,200  | gain                      | Familial                  |
| NAAR041-F9-00C04573     |                               | 9032    | 1                  | 13 13q12.12        | 22,502,100  | 23,692,300  | 1,190,200  | gain                      | Familial                  |
| NAAR054-F3-HI0298       |                               | 1154    | 3                  | 13 13q14.2         | 47,048,100  | 47,569,100  | 521,000    | gain                      | Familial                  |
| NAAR054-F4-HI0299       |                               | 1154    | 4                  | 13 13q14.2         | 47,048,100  | 47,569,100  | 521,000    | gain                      | Familial                  |
| NAAR031-G7-3212.003     |                               | 3212    | 3                  | 13 13q21.311113q21 | 63,529,600  | 65,319,400  | 1,789,800  | gain                      | Familial                  |
| NAAR031-A8-3212.005     |                               | 3212    | 5                  | 13 13q21.32        | 64,798,700  | 65,319,400  | 520,700    | gain                      | Familial                  |
| NAAR044-C3-01C06329     |                               | 7084    | 2                  | 13 13q21.32        | 65,120,700  | 65,951,300  | 830,600    | gain                      | Familial                  |
| NAAR044-C5-01C06331     |                               | 7084    | 4                  | 13 13q21.32        | 65,120,700  | 65,951,300  | 830,600    | gain                      | Familial                  |
| NAAR045-G12-POS         | 3259.3078                     | 1,2     | 13 13q31.1         | 83,604,500         | 85,823,600  | 2,219,100   | gain       | Familial                  |                           |
| NAAR055-G12-POS         | 3078.3259                     | 2,1     | 13 13q31.1         | 83,604,500         | 85,823,600  | 2,219,100   | gain       | Familial                  |                           |
| NAAR060-G12-POS         | 3078.3259                     | 2,1     | 13 13q31.1         | 83,604,500         | 85,823,600  | 2,219,100   | gain       | Familial                  |                           |
| NAAR029-F1-3156.002     |                               | 3156    | 2                  | 14 14q12           | 24,430,200  | 26,578,900  | 2,148,700  | gain                      | Familial                  |
| NAAR029-G1-3156.003     |                               | 3156    | 3                  | 14 14q12           | 24,430,200  | 26,578,900  | 2,148,700  | gain                      | Familial                  |
| NAAR048-H1-02C09931     | 1276.2036                     | 3,3     | 14 14q12           | 24,430,200         | 26,578,900  | 2,148,700   | gain       | Familial                  |                           |
| NAAR060-G12-POS         | 3078.3259                     | 2,1     | 14 14q12           | 24,430,200         | 26,578,900  | 2,148,700   | gain       | Familial                  |                           |
| NAAR072-A5-HI3244       | 1411                          | 302     | 14 14q12           | 24,430,200         | 26,578,900  | 2,148,700   | gain       | Familial                  |                           |
| NAAR072-A6-HI3245       | 1411                          | 303     | 14 14q12           | 24,430,200         | 26,578,900  | 2,148,700   | gain       | Familial                  |                           |
| NAAR073-G11-04C35577    | 5036                          | 6       | 14 14q12           | 24,430,200         | 26,578,900  | 2,148,700   | gain       | Familial                  |                           |
| NAAR076-F7-04C37159     | 6036                          | 3       | 14 14q12           | 24,430,200         | 26,578,900  | 2,148,700   | gain       | Familial                  |                           |
| NAAR029-E1-3156.001     | 3156                          | 1       | 14 14q12           | 24,835,400         | 26,578,900  | 1,743,500   | gain       | Familial                  |                           |
| NAAR030-G12-POS         | 3078.3259                     | 2,1     | 14 14q12           | 24,835,400         | 26,578,900  | 1,743,500   | gain       | Familial                  |                           |
| NAAR052-DE-03C13914     | 1276.2036                     | 1,1     | 14 14q12           | 24,835,400         | 26,578,900  | 1,743,500   | gain       | Familial                  |                           |
| NAAR024-B7-3064.003     | 3064                          | 3       | 15 15q11.2115q12   | 21,490,300         | 25,698,400  | 4,208,100   | gain       | Familial, Affy Nsp 250K   |                           |
| NAAR024-C7-3064.004     | 3064                          | 4       | 15 15q11.2115q12   | 21,490,300         | 25,698,400  | 4,208,100   | gain       | Familial, Affy Nsp 250K   |                           |
| NAAR065-EG-HI0302       | 1097                          | 3       | 15 15q11.2115q12   | 21,490,300         | 25,698,400  | 4,208,100   | gain       | Familial, FISH, MLPA      |                           |
| NAAR065-E7-HI0304       | 1097                          | 4       | 15 15q11.2115q12   | 21,490,300         | 25,698,400  | 4,208,100   | gain       | Familial, FISH, MLPA      |                           |
| NAAR024-A7-3064.002     | 3064                          | 2       | 15 15q11.2115q12   | 21,885,600         | 25,698,400  | 3,812,800   | gain       | Familial                  |                           |
| NAAR046-F11-01C08067    | 7070.8044                     | 6,201   | 15 15q11.2         | 21,885,600         | 22,083,700  | 198,100     | loss       | Mendelian Error           |                           |
| NAAR078-A3-200305415    | 4075                          | 100     | 15 15q22.1115q22.2 | 49,345,700         | 100,170,000 | 50,824,300  | gain       | Mendelian Error           |                           |
| NAAR029-C8-3169.004     | 3169                          | 4       | 16 16p13.2         | 8,241,130          | 8,435,410   | 194,280     | gain       | Familial                  |                           |
| NAAR036-DE-1014-DE-P2   | 3169                          | 3       | 16 16p13.2         | 8,241,130          | 8,435,410   | 194,280     | gain       | Familial                  |                           |
| NAAR026-B4-3099.006     | 3099                          | 6       | 16 16q21           | 60,141,700         | 61,581,600  | 1,439,900   | loss       | Familial, Mendelian Error |                           |
| NAAR026-C4-3099.007     | 3099                          | 7       | 16 16q21           | 60,141,700         | 61,581,600  | 1,439,900   | loss       | Familial, Mendelian Error |                           |
| NAAR026-D4-3099.008     | 3099                          | 8       | 16 16q21           | 60,141,700         | 61,581,600  | 1,439,900   | loss       | Familial, Mendelian Error |                           |
| NAAR001-D12-8012-111    | 8012                          | 111     | 17 17p12           | 14,304,400         | 15,237,700  | 933,300     | loss       | Familial                  |                           |
| NAAR028-B4-3135.002     | 1058.3135                     | 1,2     | 17 17p12           | 14,304,400         | 15,237,700  | 933,300     | loss       | Familial                  |                           |
| NAAR028-C4-3135.003     | 1058.3135                     | 4,3     | 17 17p12           | 14,304,400         | 15,237,700  | 933,300     | loss       | Familial, Mendelian Error |                           |
| NAAR028-D4-3135.004     | 3135.1058                     | 4,5     | 17 17p12           | 14,304,400         | 15,237,700  | 933,300     | loss       | Familial, Mendelian Error |                           |
| NAAR068-B11-HI1405      | 1263                          | 4       | 17 17p12           | 14,304,400         | 15,237,700  | 933,300     | gain       | Familial                  |                           |
| NAAR068-B12-HI1404      | 1263                          | 5       | 17 17p12           | 14,304,400         | 15,237,700  | 933,300     | gain       | Familial                  |                           |
| NAAR001-E1-8012-201     | 8012                          | 201     | 17 17p12           | 14,432,900         | 15,237,700  | 804,800     | loss       | Familial, Mendelian Error |                           |
| NAAR003-A5-8047-202     | 8047                          | 202     | 17 17q21.1117q25.1 | 33,248,900         | 76,399,500  | 43,150,600  | gain       | Mendelian Error           |                           |
| NAAR067-D10-HI2765      | 1384                          | 202     | 18 18p11.32        | 1,564,270          | 1,807,190   | 242,920     | gain       | Familial                  |                           |
| NAAR067-D12-HI2767      | 1384                          | 301     | 18 18p11.32        | 1,564,270          | 1,964,310   | 400,040     | gain       | Familial                  |                           |
| NAAR076-D4-04C36611     | 5106                          | 3       | 18 18p11.32        | 1,748,000          | 1,807,190   | 59,190      | loss       | Affy Nsp 250K             |                           |
| NAAR022-A10-3023.004    | 3023                          | 4       | 18 18p11.21118p11  | 10,741,600         | 11,601,400  | 859,800     | gain       | Familial                  |                           |
| NAAR022-G9-3023.002     | 3023                          | 2       | 18 18p11.21118p11  | 10,741,600         | 11,601,400  | 859,800     | gain       | Familial                  |                           |
| NAAR022-H9-3023.003     | 3023                          | 3       | 18 18p11.21118p11  | 10,741,600         | 11,601,400  | 859,800     | gain       | Familial                  |                           |
| NAAR031-A8-3212.005     | 3212                          | 5       | 18 18q12.2         | 32,374,000         | 32,510,700  | 136,700     | loss       | Familial, Mendelian Error |                           |
| NAAR031-E7-3212.001     | 3212                          | 1       | 18 18q12.2         | 32,374,000         | 32,510,700  | 136,700     | loss       | Familial                  |                           |
| NAAR027-G6-3121.002     | 3121                          | 2       | 18 18q12.2118q12.2 | 34,993,000         | 35,619,700  | 626,700     | loss       | Familial                  |                           |
| NAAR036-B11-1014-B1-P2  | 3121                          | 4       | 18 18q12.2118q12.2 | 34,993,000         | 35,619,700  | 626,700     | loss       | Familial, Mendelian Error |                           |
| NAAR030-C12-3198.001    | 3198                          | 1       | 19 19p13.3119p13.3 | 3,542,590          | 15,912,900  | 12,370,310  | gain       | Familial                  |                           |
| NAAR030-D12-3198.002    | 3198                          | 2       | 19 19p13.3119p13.3 | 3,542,590          | 16,332,900  | 12,790,310  | gain       | Familial                  |                           |
| NAAR037-C2-1014-C2-P3   | 3221                          | 4       | 19 19q13.4119q13   | 56,275,700         | 63,437,700  | 7,162,000   | gain       | Familial                  |                           |
| NAAR037-C1-1014-C1-P3   | 3221                          | 19      | 19q13.4119q13      | 56,763,300         | 63,437,700  | 6,674,400   | gain       | Familial                  |                           |
| NAAR041-G10-01C05471    | 7008                          | 2       | 20 20p13           | 95,685             | 1,358,480   | 1,262,795   | gain       | Familial                  |                           |
| NAAR041-G7-01C05468     | 7008                          | 4       | 20 20p13           | 95,685             | 691,220     | 595,535     | gain       | Familial                  |                           |
| NAAR017-C1-HI2201       | 1318                          | 2       | 21 21q22.11        | 30,538,900         | 30,983,100  | 444,200     | gain       | Familial                  |                           |
| NAAR017-C2-HI2202       | 1318                          | 3       | 21 21q22.11        | 30,538,900         | 30,983,100  | 444,200     | gain       | Familial                  |                           |
| NAAR063-B1-HI1183_2     | 1004                          | 4       | 22 22q11.21        | 17,508,900         | 20,306,800  | 2,797,900   | gain       | Familial, FISH            |                           |
| NAAR063-A10-HI1180      | 1004                          | 2       | 22 22q11.21        | 18,008,700         | 19,774,000  | 1,765,300   | gain       | Familial, FISH            |                           |
| NAAR053-F1-03C15328     | 2072                          | 2       | 22 22q13.33        | 48,004,600         | 48,881,300  | 876,700     | loss       | Familial, Affy Nsp 250K   |                           |
| NAAR072-F11-200501053   | 2072                          | 1       | 22 22q13.33        | 48,004,600         | 48,881,300  | 876,700     | loss       | Familial, Affy Nsp 250K   |                           |

List of Validated CNVs in Filtered Analysis

| SCAN ID              | Family ID  | Invd ID | chr     | cytband          | start      | stop       | size      | cnv (loss/gain) | Validation                |
|----------------------|------------|---------|---------|------------------|------------|------------|-----------|-----------------|---------------------------|
| NAAR008-H10-8250-111 | 135918250  |         | 201111  | 1 1p36.2211p36.2 | 10,931,500 | 15,413,600 | 4,482,100 | gain            | Familial                  |
| NAAR051-F7-HI2612    | 825011359  |         | 1111201 | 1 1p36.2211p36.2 | 10,931,500 | 15,413,600 | 4,482,100 | gain            | Familial                  |
| NAAR047-C10-01C08464 | 1116197101 |         | 417     | 1 1p35.2         | 30,265,700 | 30,817,000 | 551,300   | loss            | Familial, Mendelian Error |
| NAAR047-C8-01C08462  | 1116197101 |         | 111     | 1 1p35.2         | 30,265,700 | 30,817,000 | 551,300   | loss            | Familial                  |
| NAAR060-G3-HI2323    | 710111116  |         | 111     | 1 1p35.2         | 30,265,700 | 30,896,500 | 630,800   | loss            | Familial                  |
| NAAR074-A7-04C35667  | 5116       |         | 5       | 1 1p31.3         | 60,389,500 | 61,350,000 | 960,500   | gain            | Familial                  |
| NAAR074-C3-04C35691  | 5116       |         | 1       | 1 1p31.3         | 60,629,100 | 61,350,000 | 720,900   | gain            | Familial                  |
| NAAR074-D1-04C35701  | 5116       |         | 4       | 1 1p31.3         | 60,629,100 | 61,3       |           |                 |                           |

| SCAN ID               | Family ID  | Invid ID   | chr | cytoband         | start       | stop        | size        | cnv (loss/gain) | Validation                               |
|-----------------------|------------|------------|-----|------------------|-------------|-------------|-------------|-----------------|------------------------------------------|
| NAAR030-F9-3192.001   |            | 3192       | 1   | 3 p31.2.2        | 82,496,200  | 83,190,200  | 694,000     | gain            | Familial                                 |
| NAAR037-A9-1014-A9-P3 |            | 3192       | 4   | 3 p31.2.2        | 82,496,200  | 83,190,200  | 694,000     | loss            | Familial, Mendelian Error                |
| NAAR025-D4-3081.005   |            | 3081       | 5   | 3 q12.1          | 85,618,700  | 85,618,700  | 0           | loss            | Mendelian Error                          |
| NAAR072-G5-H10615     |            | 1023       | 8   | 3 q13.31         | 117,973,000 | 118,274,000 | 301,000     | loss            | Familial                                 |
| NAARCP2-D11-H10615    |            | 1023       | 8   | 3 q13.31         | 117,973,000 | 118,274,000 | 301,000     | loss            | Familial                                 |
| NAAR052-F6-H10682     |            | 1092       | 4   | 4 p16.31p16.21u  | 398,952     | 17,044,800  | 16,645,848  | loss            | Mendelian Error                          |
| NAAR062-H3-H1083      |            | 1218       | 3   | 4 p16.31p16.21u  | 398,952     | 6,790,030   | 6,391,078   | loss            | Mendelian Error                          |
| NAAR052-F6-H10682     |            | 1092       | 4   | 4 p16.321p15.3   | 18,188,800  | 23,734,300  | 5,545,500   | gain            | Mendelian Error                          |
| NAAR045-G12-POS       | 3259/3076  | 112        | 11  | 4 p15.21p15.1    | 27,420,500  | 28,639,200  | 1,218,700   | gain            | Familial                                 |
| NAAR054-G12-POS       | 3078/3259  | 211        | 4   | 4 p15.1          | 28,022,000  | 31,238,500  | 3,216,500   | gain            | Familial                                 |
| NAAR033-C1-3257.002   |            | 3257       | 2   | 4 q13.3          | 71,219,300  | 71,371,300  | 152,000     | loss            | Familial                                 |
| NAAR033-E1-3257.005   |            | 3257       | 5   | 4 q13.3          | 71,219,300  | 71,371,300  | 152,000     | loss            | Familial, Mendelian Error                |
| NAAR010-F6-8268-111   |            | 8268       | 111 | 4 q26            | 116,524,000 | 118,226,000 | 1,702,000   | gain            | Familial                                 |
| NAAR010-F7-8268-201   |            | 8268       | 201 | 4 q26            | 117,347,000 | 118,226,000 | 879,000     | gain            | Familial                                 |
| NAAR047-F7-01C0499    |            | 7126       | 1   | 4 q35.11q35.2    | 185,809,000 | 189,310,000 | 3,501,000   | gain            | Familial                                 |
| NAAR047-F6-01C08500   |            | 7126       | 4   | 4 q35.11q35.2    | 185,809,000 | 189,310,000 | 3,501,000   | gain            | Familial                                 |
| NAAR047-F9-01C08501   |            | 7126       | 3   | 4 q35.11q35.2    | 185,809,000 | 189,310,000 | 3,501,000   | gain            | Familial                                 |
| NAAR062-D5-H10889     |            | 1088       | 3   | 4 q35.2          | 188,796,000 | 189,905,000 | 1,109,000   | gain            | Familial                                 |
| NAAR062-D6-H10890     |            | 1088       | 4   | 4 q35.2          | 188,901,000 | 189,905,000 | 1,004,000   | gain            | Familial                                 |
| NAAR062-D7-H10891     |            | 1088       | 5   | 4 q35.2          | 188,901,000 | 189,310,000 | 409,000     | loss            | Familial                                 |
| NAAR027-C6-3120.003   |            | 3120       | 3   | 4 q35.2          | 189,303,000 | 189,310,000 | 7,000       | loss            | Familial                                 |
| NAAR027-D6-3120.004   |            | 3120       | 4   | 4 q35.2          | 189,303,000 | 189,310,000 | 7,000       | loss            | Familial                                 |
| NAAR027-E6-3120.005   |            | 3120       | 5   | 4 q35.2          | 189,303,000 | 189,310,000 | 7,000       | loss            | Familial                                 |
| NAAR070-H5-H13148     |            | 1420       | 302 | 4 q35.2          | 189,303,000 | 189,310,000 | 7,000       | loss            | Familial                                 |
| NAAR071-A5-H13159     |            | 1420       | 201 | 4 q35.2          | 189,303,000 | 189,310,000 | 7,000       | loss            | Familial                                 |
| NAAR071-A7-H13161     |            | 1420       | 303 | 4 q35.2          | 189,303,000 | 189,310,000 | 7,000       | loss            | Familial                                 |
| NAAR023-D9-3046.001   |            | 3046       | 1   | 4 q35.2          | 189,670,000 | 190,118,000 | 448,000     | loss            | Familial                                 |
| NAAR023-F9-3046.003   |            | 3046       | 3   | 4 q35.2          | 189,670,000 | 190,118,000 | 448,000     | loss            | Familial, Mendelian Error                |
| NAAR062-D4-H10888     |            | 1088       | 2   | 4 q35.2          | 189,670,000 | 189,905,000 | 235,000     | gain            | Familial                                 |
| NAAR073-E12-04C35554  |            | 5035       | 3   | 4 q35.2          | 189,670,000 | 190,118,000 | 448,000     | gain            | Familial                                 |
| NAAR073-F2-04C35556   |            | 5035       | 4   | 4 q35.2          | 189,670,000 | 190,200,000 | 530,000     | gain            | Familial                                 |
| NAAR073-H10-04C35587  |            | 5035       | 2   | 4 q35.2          | 189,670,000 | 190,118,000 | 448,000     | gain            | Familial                                 |
| NAAR024-A12-3072.008  |            | 3072       | 8   | 4 q35.2          | 189,808,000 | 191,091,000 | 1,283,000   | loss            | Familial, Mendelian Error                |
| NAAR024-B12-3072.009  |            | 3072       | 9   | 4 q35.2          | 189,808,000 | 191,091,000 | 1,283,000   | loss            | Familial, Mendelian Error                |
| NAAR024-G11-3072.006  |            | 3072       | 6   | 4 q35.2          | 189,808,000 | 191,091,000 | 1,283,000   | loss            | Familial, Mendelian Error                |
| NAAR041-G10-01C05471  |            | 7008       | 2   | 4 q35.2          | 190,013,000 | 191,091,000 | 1,078,000   | loss            | Familial                                 |
| NAAR041-G7-01C05468   |            | 7008       | 4   | 4 q35.2          | 190,013,000 | 191,091,000 | 1,078,000   | loss            | Familial, Mendelian Error                |
| NAAR003-A5-8047-202   |            | 8047       | 202 | 5 p15.331p15.31  | 1,677,530   | 8,438,300   | 6,760,950   | loss            | Familial, Mendelian Error                |
| NAAR030-D12-3198.002  |            | 3198       | 2   | 5 p14.1          | 29,073,500  | 29,136,100  | 62,600      | loss            | Familial                                 |
| NAAR030-E12-3198.003  |            | 3198       | 3   | 5 p14.1          | 29,073,500  | 29,136,100  | 62,600      | loss            | Familial, Mendelian Error, Afly Nsp 250K |
| NAAR030-F12-3198.004  |            | 3198       | 4   | 5 p14.1          | 29,073,500  | 29,136,100  | 62,600      | loss            | Familial, Mendelian Error                |
| NAAR031-A1-3198.005   |            | 3198       | 5   | 5 p14.1          | 29,073,500  | 29,136,100  | 62,600      | loss            | Familial                                 |
| NAAR050-H5-H12533     |            | 1356       | 302 | 5 p14.1          | 29,073,500  | 29,136,100  | 62,600      | loss            | Familial, Mendelian Error                |
| NAAR069-C1-H12941     |            | 1356       | 201 | 5 p14.1          | 29,073,500  | 29,136,100  | 62,600      | loss            | Familial                                 |
| NAAR062-A11-H10781    |            | 1172       | 4   | 5 p12.21p12.31t  | 62,596,000  | 179,796,000 | 117,200,000 | gain            | Mendelian Error                          |
| NAAR047-C10-01C08464  | 1116/0710  | 417        | 5   | 5 q23.1          | 108,371,000 | 109,116,000 | 745,000     | gain            | Familial                                 |
| NAAR047-C11-01C08465  | 7101/1116  | 1045       | 5   | 5 q23.1          | 108,371,000 | 109,116,000 | 745,000     | gain            | Familial                                 |
| NAAR047-E4-01C08484   |            | 7113       | 4   | 5 q23.1          | 117,078,000 | 119,691,000 | 2,613,000   | loss            | Mendelian Error                          |
| NAAR073-A1-02C09714   |            | 2068/12068 | 314 | 6 p25.3          | 150,610     | 1,478,110   | 1,327,500   | gain            | Familial                                 |
| NAAR073-A3-02C09716   |            | 2068       | 2   | 6 p25.3          | 150,610     | 1,478,110   | 1,327,500   | gain            | Familial                                 |
| NAAR052-F3-H10633     |            | 1041       | 3   | 6 p25.31p25.21t  | 374,457     | 30,443,000  | 30,068,543  | loss            | Mendelian Error                          |
| NAAR055-A4-H10442     |            | 1066       | 4   | 6 p25.21p25.11t  | 3,801,430   | 18,594,500  | 14,793,070  | loss            | Mendelian Error                          |
| NAAR078-A3-200305415  |            | 4075       | 100 | 6 p21.1p22.11p21 | 113,107,000 | 121,389,000 | 8,292,000   | loss            | Mendelian Error                          |
| NAAR078-A3-200305415  |            | 4075       | 100 | 6 p22.311p22.3   | 122,787,000 | 130,388,000 | 7,601,000   | loss            | Mendelian Error                          |
| NAAR078-A3-200305415  |            | 4075       | 100 | 6 p24.21p24.3    | 144,964,000 | 148,225,000 | 3,261,000   | loss            | Mendelian Error                          |
| NAAR052-G9-H11097     |            | 1047       | 4   | 6 p26            | 163,090,000 | 163,493,000 | 403,000     | gain            | Familial                                 |
| NAAR017-C4-H12209     |            | 1047       | 8   | 6 p26            | 163,493,000 | 163,493,000 | 1,000       | gain            | Familial                                 |
| NAAR064-A8-H11697     |            | 1284       | 102 | 6 p261p26q27     | 164,166,000 | 165,792,000 | 1,626,000   | loss            | Mendelian Error                          |
| NAAR063-F2-H11522     |            | 1226       | 7   | 7 p12.31p12.2    | 49,519,500  | 50,739,200  | 1,219,700   | gain            | Familial                                 |
| NAAR063-F4-H11524     |            | 1226       | 6   | 7 p12.31p12.2    | 49,519,500  | 50,046,800  | 527,400     | gain            | Familial                                 |
| NAAR064-A2-H11684     |            | 1245       | 6   | 7 q21.1          | 83,174,700  | 84,701,800  | 1,527,100   | loss            | Familial                                 |
| NAAR064-A4-H11686     |            | 1245       | 9   | 7 q21.1          | 83,174,700  | 85,227,400  | 2,052,700   | loss            | Familial, Mendelian Error                |
| NAAR061-A6-H10130     |            | 1010       | 4   | 7 q31.32         | 120,844,000 | 121,741,000 | 897,000     | loss            | Familial                                 |
| NAAR061-A5-H10128     |            | 1010       | 5   | 7 q31.32         | 121,543,000 | 122,291,000 | 748,000     | loss            | Familial, Mendelian Error                |
| NAAR057-103           | 1065/07103 | 415        | 7   | 7 q36.1          | 149,576,000 | 149,709,000 | 133,000     | loss            | Mendelian Error                          |
| NAAR063-C5-H13372     |            | 1261       | 5   | 8 p23.2          | 3,909,530   | 3,910,100   | 1,000       | gain            | Familial                                 |
| NAAR067-A8-H12741     |            | 1261       | 8   | 8 p23.2          | 3,909,530   | 3,909,710   | 1,000       | gain            | Familial                                 |
| NAAR054-C1-H10191     | 7052/11017 | 313        | 8   | 8 p23.2          | 4,473,850   | 4,949,310   | 475,460     | gain            | Familial                                 |
| NAAR054-B12-H10189    | 1017/17052 | 211        | 8   | 8 p23.2          | 4,881,960   | 4,949,310   | 67,350      | gain            | Familial                                 |
| NAAR007-E6-8175-201   |            | 8175       | 201 | 8 p23.1          | 8,160,870   | 11,422,100  | 3,261,230   | loss            | Mendelian Error                          |
| NAAR041-F5-00C03537   |            | 2029       | 2   | 8 p22            | 13,570,600  | 14,168,200  | 597,600     | gain            | Familial                                 |
| NAAR041-G2-00C04611   |            | 2029       | 3   | 8 p22            | 13,570,600  | 14,168,200  | 597,600     | gain            | Familial                                 |
| NAAR050-H5-H12533     |            | 1356       | 302 | 9 p24.3          | 239,391     | 559,992     | 320,601     | gain            | Familial                                 |
| NAAR064-F6-H12067     |            | 1305       | 3   | 9 p24.31p24.21t  | 239,391     | 33,916,500  | 33,677,109  | gain            | Familial                                 |
| NAAR064-F8-H12081     |            | 1305       | 2   | 9 p24.3          | 239,391     | 1,599,250   | 1,359,859   | gain            | Familial                                 |
| NAAR069-C1-H12941     |            | 1356       | 201 | 9 p24.3          | 239,391     | 559,992     | 320,601     | gain            | Familial                                 |
| NAAR041-F10-00C04574  |            | 9032       | 4   | 9 p23            | 11,611,200  | 12,277,900  | 666,700     | loss            | Familial, Mendelian Error                |
| NAAR041-F12-00C04583  |            | 9032       | 2   | 9 p23            | 11,611,200  | 12,277,900  | 666,700     | loss            | Familial                                 |
| NAAR002-G12-9045-101  | 1008/8045  | 11101      | 9   | 9 p23            | 12,010,900  | 12,277,900  | 267,000     | loss            | Familial                                 |
| NAAR052-H6-H11012     |            | 1183       | 3   | 9 p23            | 12,010,900  | 12,277,900  | 267,000     | loss            | Familial, Mendelian Error                |
| NAAR071-H9-H11766     | 1008/8045  | 11101      | 9   | 9 p23            | 12,010,900  | 12,277,900  | 267,000     | loss            | Familial                                 |
| NAAR017-E6-H12334     |            | 1302       | 3   | 9 p13.31p13.21t  | 34,733,600  | 80,821,100  | 46,087,500  | gain            | Mendelian Error                          |
| NAAR022-A8-3019.004   |            | 3019       | 4   | 9 p21.121p21.1   | 70,619,600  | 70,908,800  | 289,200     | loss            | Familial, Mendelian Error                |
| NAAR022-H7-3019.003   |            | 3019       | 3   | 9 p21.121p21.1   | 70,619,600  | 70,908,800  | 289,200     | loss            | Familial                                 |
| NAAR017-E6-H12334     |            | 1302       | 3   | 9 p22.321p22.3   | 94,369,100  | 100,208,000 | 5,838,900   | gain            | Mendelian Error                          |
| NAAR065-E12-H10179    |            | 1129       | 2   | 10 p13           | 13,087,500  | 13,302,400  | 214,900     | loss            | Familial                                 |
| NAAR065-F2-H10182     |            | 1129       | 4   | 10 p13           | 13,087,500  | 13,302,400  | 214,900     | loss            | Familial, Mendelian Error                |
| NAAR060-A6-H12164     |            | 1335       | 2   | 10 q11.2211q11   | 49,217,200  | 51,475,300  | 2,258,100   | gain            | Familial                                 |
| NAAR060-A7-H12165     |            | 1335       | 3   | 10 q11.2211q11   | 49,217,200  | 50,638,800  | 1,421,600   | gain            | Familial                                 |
| NAAR060-A8-H12166     |            | 1335       | 4   | 10 q11.2211q11   | 49,217,200  | 50,638,800  | 1,421,600   | gain            | Familial                                 |
| NAAR043-H10-01C08237  |            | 7089       | 3   | 10 q12.1         | 59,937,900  | 59,938,400  | 500         | gain            | Familial                                 |
| NAAR030-F10-3194.001  |            | 3194       | 1   | 10 q12.1.3       | 68,424,900  | 68,552,100  | 127,200     | gain            | Familial                                 |
| NAAR030-G10-3194.003  |            | 3194       | 3   | 10 q12.1.3       | 68,424,900  | 68,552,100  | 127,200     | gain            | Familial                                 |
| NAAR076-G4-04C37169   |            | 5058       | 4   | 11 p14.3         | 21,709,100  | 21,709,300  | 1,000       | gain            | Familial                                 |
| NAAR076-G5-04C37170   |            | 5058       | 3   | 11 p14.3         | 21,709,100  | 21,709,300  | 1,000       | gain            | Familial                                 |
| NAAR022-E3-3011.005   |            | 3011       | 5   | 11 p11.12        | 49,879,900  | 50,595,000  | 715,100     | gain            | Familial                                 |
| NAAR068-E10-H12858    |            | 1440       | 201 | 11 p11.12        | 49,879,900  | 50,418,400  | 538,500     | gain            | Familial                                 |
| NAAR068-E11-H12859    |            | 1440       | 303 | 11 p11.12        | 49,879,900  | 50,595,000  | 715,100     | gain            | Familial                                 |
| NAAR056-C2-H10799     |            | 1203       | 4   | 11 p11.12        | 50,096,900  | 50,595,000  | 498,100     | gain            | Familial                                 |
| NAAR056-C4-H10801     |            | 1203       | 2   | 11 p11.12        | 50,096,900  | 50,595,000  | 498,100     | gain            | Familial                                 |
| NAAR068-F2-H12862     |            | 1440       | 302 | 11 p11.12        | 50,096,900  | 50,595,000  | 498,100     | gain            | Familial                                 |
| NAAR022-B3-3011.002   |            | 3011       | 2   | 11 p11.12        | 50,123,600  | 50,595,000  | 471,400     | gain            | Familial                                 |
| NAAR074-C12-04C3570   |            | 5081       | 4   | 11 p11.12        | 51,247,900  | 51,319,500  | 71,600      | gain            | Afly Nsp 250K                            |
| NAAR001-F11-8017-202  |            | 8017       | 202 | 11 q14.1         | 77,603,900  | 77,613,800  | 9,900       | loss            | Mendelian Error                          |
| NAAR026-G7-3105.004   |            | 3105       | 4   | 11 q12.3         | 103,005,000 | 103,045,000 | 40,000      | loss            | Mendelian Error                          |
| NAAR020-D6-H11175     |            | 1117       | 2   | 11 q12.3         | 103,928,000 | 104,733,000 | 805,000     | gain            | Familial                                 |
| NAAR063-B2-H11189     |            | 1117       | 3   | 11 q12.3         | 103,928,000 | 104,849,000 | 921,000     | gain            | Familial                                 |
| NAAR063-B3-H1119      |            |            |     |                  |             |             |             |                 |                                          |

| SCAN ID                 | Family ID | Invd ID | chr   | cytoband            | start      | stop        | size       | cnv (loss/gain) | Validation                               |
|-------------------------|-----------|---------|-------|---------------------|------------|-------------|------------|-----------------|------------------------------------------|
| NAAR054-F4-H10299       |           | 1154    | 4     | 13 13q14.2          | 47,048,100 | 47,569,100  | 521,000    | gain            | Familial                                 |
| NAAR031-G7-3212.003     |           | 3212    | 3     | 13 13q21.31t113q21  | 63,529,600 | 65,319,400  | 1,789,800  | gain            | Familial                                 |
| NAAR031-A8-3212.005     |           | 3212    | 5     | 13 13q21.32         | 64,798,700 | 65,319,400  | 520,700    | gain            | Familial                                 |
| NAAR044-C3-01C06329     |           | 7084    | 2     | 13 13q21.32         | 65,120,700 | 65,951,300  | 830,600    | gain            | Familial                                 |
| NAAR044-C5-01C06331     |           | 7084    | 4     | 13 13q21.32         | 65,120,700 | 65,951,300  | 830,600    | gain            | Familial                                 |
| NAAR024-B7-3064.003     |           | 3064    | 3     | 15 15q11.2t115q12   | 21,490,300 | 25,698,400  | 4,208,100  | gain            | Familial, Affy Nsp 250K                  |
| NAAR024-C7-3064.004     |           | 3064    | 4     | 15 15q11.2t115q12   | 21,490,300 | 25,698,400  | 4,208,100  | gain            | Familial, Affy Nsp 250K                  |
| NAAR065-E6-H10302       |           | 1097    | 3     | 15 15q11.2t115q12   | 21,490,300 | 25,698,400  | 4,208,100  | gain            | Familial, FISH, MLPA                     |
| NAAR065-E7-H10304       |           | 1097    | 4     | 15 15q11.2t115q12   | 21,490,300 | 25,698,400  | 4,208,100  | gain            | Familial, FISH, MLPA                     |
| NAAR024-A7-3064.002     |           | 3064    | 2     | 15 15q11.2t115q12   | 21,885,600 | 25,698,400  | 3,812,800  | gain            | Familial                                 |
| NAAR046-F11-01C08067    | 70706044  |         | 6t201 | 15 15q11.2          | 21,885,600 | 22,083,700  | 198,100    | loss            | Familial, Mendelian Error                |
| NAAR078-A3-200305415    |           | 4075    | 100   | 15 15q22.1t15q22.1  | 49,345,700 | 100,170,000 | 50,824,300 | gain            | Familial, Mendelian Error                |
| NAAR029-C8-3169.004     |           | 3169    | 4     | 16 16p13.2          | 8,241,130  | 8,435,410   | 194,280    | gain            | Familial                                 |
| NAAR026-B4-3099.006     |           | 3099    | 6     | 16 16q21            | 60,141,700 | 61,581,600  | 1,439,900  | loss            | Familial, Mendelian Error                |
| NAAR026-C4-3099.007     |           | 3099    | 7     | 16 16q21            | 60,141,700 | 61,581,600  | 1,439,900  | loss            | Familial, Mendelian Error                |
| NAAR026-D4-3099.008     |           | 3099    | 8     | 16 16q21            | 60,141,700 | 61,581,600  | 1,439,900  | loss            | Familial, Mendelian Error                |
| NAAR001-D12-8012-111    |           | 8012    | 111   | 17 17p12            | 14,304,400 | 15,237,700  | 933,300    | loss            | Familial                                 |
| NAAR028-B4-3135.002     | 1058t3135 |         | 1t2   | 17 17p12            | 14,304,400 | 15,237,700  | 933,300    | loss            | Familial                                 |
| NAAR028-C4-3135.003     | 1058t3135 |         | 4t3   | 17 17p12            | 14,304,400 | 15,237,700  | 933,300    | loss            | Familial, Mendelian Error                |
| NAAR028-D4-3135.004     | 3135t1058 |         | 4t5   | 17 17p12            | 14,304,400 | 15,237,700  | 933,300    | loss            | Familial, Mendelian Error                |
| NAAR068-B11-H11405      |           | 1263    | 4     | 17 17p12            | 14,304,400 | 15,237,700  | 933,300    | gain            | Familial                                 |
| NAAR068-B12-H11404      |           | 1263    | 5     | 17 17p12            | 14,304,400 | 15,237,700  | 933,300    | gain            | Familial                                 |
| NAAR001-E1-8012-201     |           | 8012    | 201   | 17 17p12            | 14,432,900 | 15,237,700  | 804,800    | loss            | Familial, Mendelian Error                |
| NAAR003-A5-8047-202     |           | 8047    | 202   | 17 17q21.1t17q25.1  | 33,248,900 | 76,399,500  | 43,150,600 | gain            | Familial                                 |
| NAAR076-D4-04C36611     |           | 5106    | 3     | 18 18p11.32         | 1,748,000  | 1,807,190   | 59,190     | loss            | Affy Nsp 250K                            |
| NAAR067-D10-H12765      |           | 1384    | 202   | 18 18p11.32         | 1,564,270  | 1,807,190   | 242,920    | gain            | Familial                                 |
| NAAR067-D12-H12767      |           | 1384    | 301   | 18 18p11.32         | 1,564,270  | 1,964,310   | 400,040    | gain            | Familial                                 |
| NAAR022-A10-3023.004    |           | 3023    | 4     | 18 18p11.2t118p11   | 10,741,600 | 11,601,400  | 859,800    | gain            | Familial                                 |
| NAAR022-G9-3023.002     |           | 3023    | 2     | 18 18p11.2t118p11   | 10,741,600 | 11,601,400  | 859,800    | gain            | Familial                                 |
| NAAR022-H9-3023.003     |           | 3023    | 3     | 18 18p11.2t118p11   | 10,741,600 | 11,601,400  | 859,800    | gain            | Familial                                 |
| NAAR031-A8-3212.005     |           | 3212    | 5     | 18 18q12.2          | 32,374,000 | 32,510,700  | 136,700    | loss            | Familial, Mendelian Error                |
| NAAR031-E7-3212.001     |           | 3212    | 1     | 18 18q12.2          | 32,374,000 | 32,510,700  | 136,700    | loss            | Familial                                 |
| NAAR027-G6-3121.002     |           | 3121    | 2     | 18 18q12.2t118q12.1 | 34,993,000 | 35,619,700  | 626,700    | loss            | Familial                                 |
| NAAR036-B11-1014-B11-P2 |           | 3121    | 4     | 18 18q12.2t118q12.1 | 34,993,000 | 35,619,700  | 626,700    | loss            | Familial, Mendelian Error                |
| NAAR030-C12-3198.001    |           | 3198    | 1     | 19 19p13.3t19p13.1  | 3,542,590  | 15,912,900  | 12,370,310 | gain            | Familial                                 |
| NAAR030-D12-3198.002    |           | 3198    | 2     | 19 19p13.3t19p13.1  | 3,542,590  | 16,332,900  | 12,790,310 | gain            | Familial                                 |
| NAAR041-G10-01C05471    |           | 7008    | 2     | 20 20p13            | 95,685     | 1,358,480   | 1,262,795  | gain            | Familial                                 |
| NAAR041-G7-01C05468     |           | 7008    | 4     | 20 20p13            | 95,685     | 691,220     | 595,535    | gain            | Familial                                 |
| NAAR017-C1-H12201       |           | 1318    | 2     | 21 21q22.11         | 30,538,900 | 30,983,100  | 444,200    | gain            | Familial                                 |
| NAAR017-C2-H12202       |           | 1318    | 3     | 21 21q22.11         | 30,538,900 | 30,983,100  | 444,200    | gain            | Familial                                 |
| NAAR063-B1-H11183_2     |           | 1004    | 4     | 22 22q11.21         | 17,506,900 | 20,306,800  | 2,799,900  | gain            | Familial, FISH                           |
| NAAR063-A10-H11180      |           | 1004    | 2     | 22 22q11.21         | 18,008,700 | 19,774,000  | 1,765,300  | gain            | Familial, FISH                           |
| NAAR053-F1-03C15328     |           | 2072    | 2     | 22 22q13.33         | 48,004,600 | 48,881,300  | 876,700    | loss            | Familial, Mendelian Error, Affy Nsp 250K |
| NAAR072-F11-200501053   |           | 2072    | 1     | 22 22q13.33         | 48,004,600 | 48,881,300  | 876,700    | loss            | Familial, Affy Nsp 250K                  |
